# Supplementary material for: Fast reductive defluorination of branched perfluorooctane sulfonic acids by cobalt phthalocyanine: electrochemical studies and mechanistic insights
Source: Royal Society of Chemistry journal article supplement (doi:10.1039/d3ew00612c), 2023-11-06
Supplement: d3ew00612c1.pdf [file d3ew00612c1.pdf]

***Supporting information***

***for***

**Fast reductive defluorination of branched perfluorooctane  
sulfonic acids by cobalt phthalocyanine: Electrochemical  
studies and mechanistic insights**

Maryam Mirabediny,<sup>1</sup> Tsz Tin Yu,<sup>1</sup> Jun Sun,<sup>1</sup> Matthew Lee,<sup>2</sup> Denis M O'Carroll,<sup>2</sup> Michael J  
Manefield,<sup>2</sup> Björn Åkermark,<sup>3</sup> Biswanath Das,<sup>3</sup> \* Naresh Kumar<sup>1</sup> \*

<sup>1</sup>School of Chemistry, The University of New South Wales, Sydney, NSW 2052, Australia

<sup>2</sup>School of Civil and Environmental Engineering, Water Research Centre, The University of New  
South Wales, Sydney, NSW 2052, Australia

<sup>3</sup>Department of Organic Chemistry, Arrhenius Laboratory, Stockholm University, Svante  
Arrhenius väg 16C, SE-10691 Stockholm, Sweden

\*Corresponding authors.

E-mail address: n.kumar@unsw.edu.au (Prof. Naresh Kumar); biswanath.das@su.se /  
das.biswanath85@gmail.com (Dr. Biswanath Das).

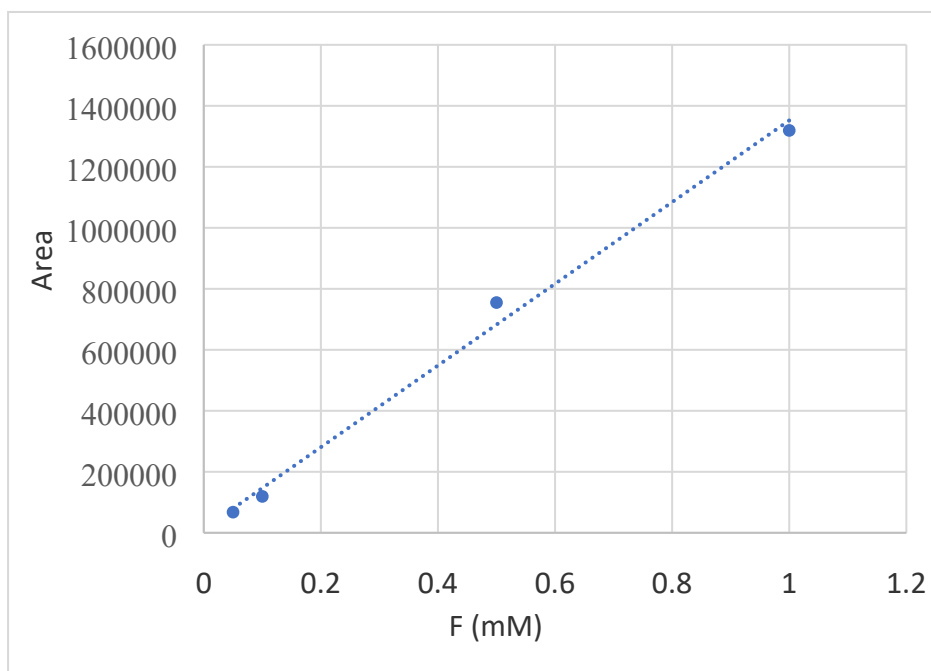

**Fig. S1.** Calibration curve of fluoride concentration.

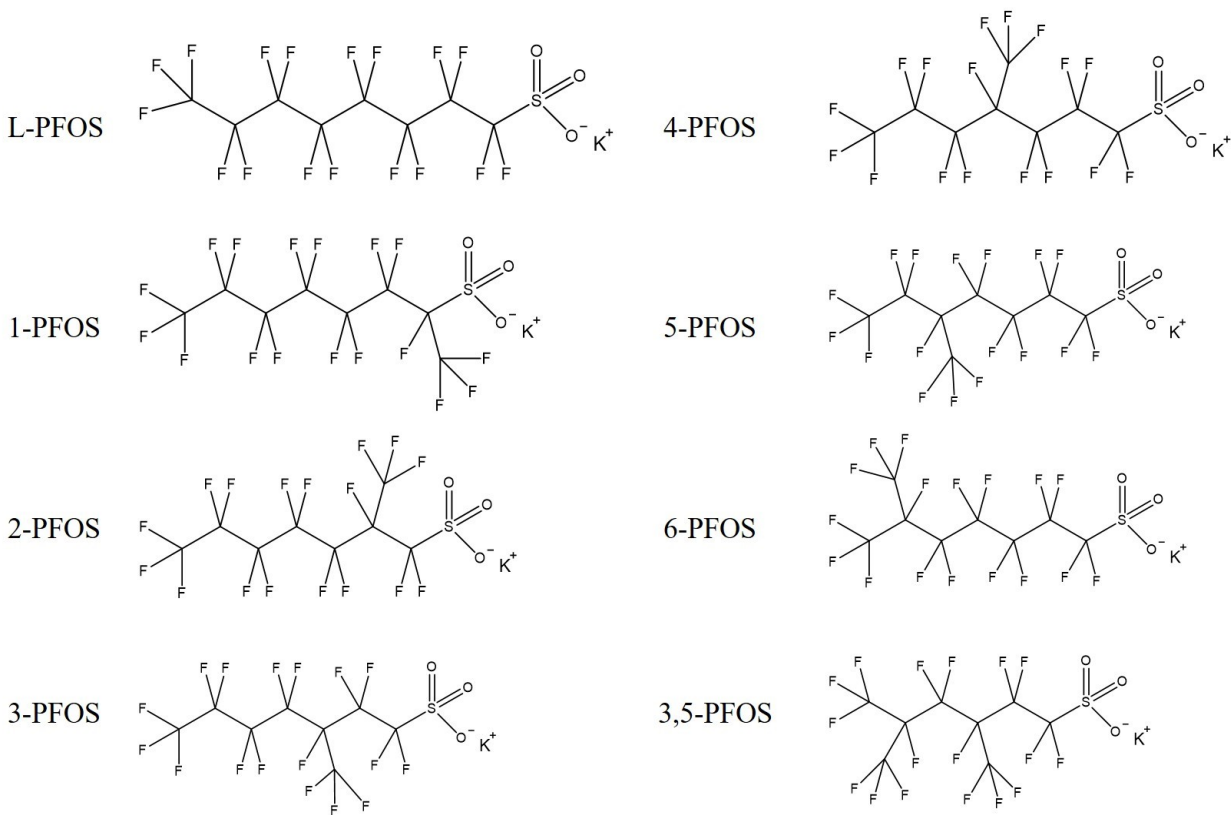

**Fig. S2.** Chemical structures of linear and branched isomers of PFOS.

**Table S1.** Chemical and structural information of the used catalysts in this study.

| Name, symbol                              | Chemical structure                                                                   | CAS and Supplier            |
|-------------------------------------------|--------------------------------------------------------------------------------------|-----------------------------|
| 29H,31H-Phthalocyanine, Pc                | 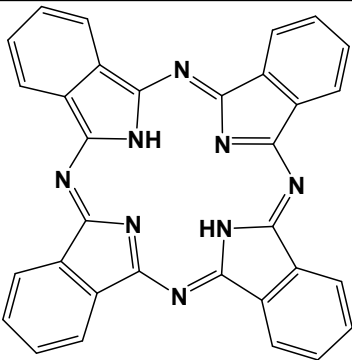   | 574-93-6 by sigma-Aldrich   |
| Copper <sup>II</sup> phthalocyanine, CuPc |   | 147-14-8 by sigma-Aldrich   |
| Cobalt <sup>II</sup> phthalocyanine, CoPc |  | 3317-67-7 by sigma-Aldrich  |
| Silicon phthalocyanine dichloride, SiPc   |  | 19333-10-9 by sigma-Aldrich |

Nickel<sup>II</sup> phthalocyanine, NiPc

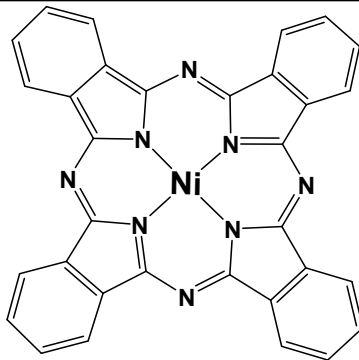

14055-02-8 by sigma-Aldrich

Iron<sup>II</sup> phthalocyanine, FePc

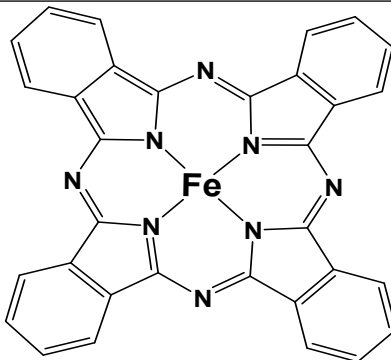

132-16-1 by sigma-Aldrich

Sodium cobalt<sup>II</sup> tetrasulfophthalocyanine, CoTSPc

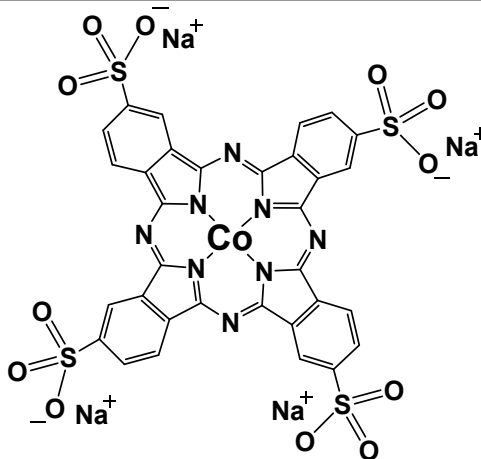

14586-48-2  
Synthesized in-house

Cobalt<sup>II</sup> tetranitrophthalocyanine, CoTNPc

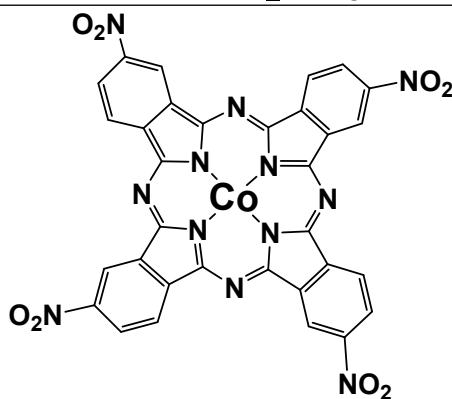

27680-28-0  
Synthesized in-house



Cyanocob<sup>III</sup>alamin, VB<sub>12</sub>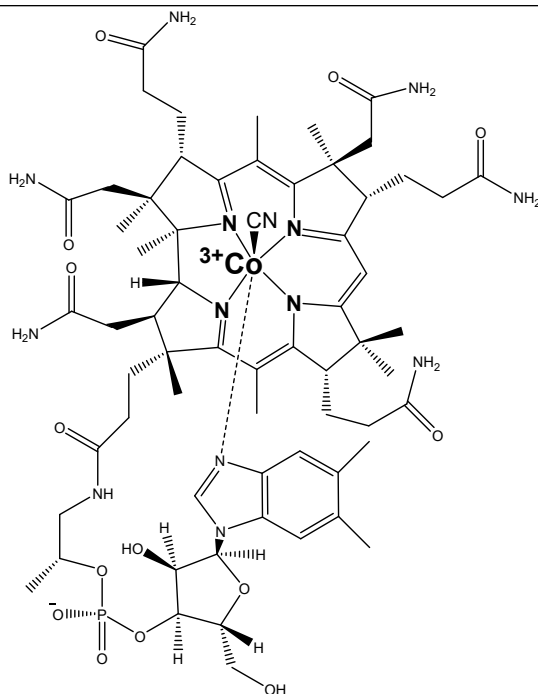

68-19-9 by sigma-Aldrich

**Table S2.** Parameter details for PFOS branched and linear isomers detection in LC–MS/MS.

| Isomer name       | 6-methyl PFOS | 5 and 3-methyl PFOS | 4-methyl PFOS | 3,5-dimethyl PFOS | 1 and 2-methyl PFOS | L-PFOS |
|-------------------|---------------|---------------------|---------------|-------------------|---------------------|--------|
| Precursor (m/z)   | 499           | 499                 | 499           | 499               | 499                 | 499    |
| Product (m/z)     | 169           | 280                 | 330           | 280               | 99                  | 80     |
| Dwell time (msec) | 5             | 5                   | 5             | 5                 | 5                   | 3      |
| CE                | 35            | 35                  | 35            | 35                | 40                  | 41     |

**Table S3.** Isomer composition of technical PFOS used in this study based on LC–MS/MS analysis.

| Isomer name     | 6-methyl PFOS | 5-methyl PFOS | 4-methyl PFOS | 3-methyl PFOS | 3,5-dimethyl PFOS | 1 and 2-methyl PFOS | L-PFOS | Other isomers |
|-----------------|---------------|---------------|---------------|---------------|-------------------|---------------------|--------|---------------|
| Composition (%) | 5.81          | 4.16          | 1.90          | 3.41          | 1.19              | 1.39                | 80.27  | 1.85          |

### Synthesis of sodium cobalt<sup>II</sup> tetrasulfophthalocyanine (CoTSPc)

Cobalt<sup>II</sup> phthalocyanine (0.51 g, 0.90 mmol) in oleum (10 mL; 20% SO<sub>3</sub>) was heated at 145 °C for 3 h. After the reaction mixture was cooled to room temperature, it was poured into cold distilled water (200 mL). Sodium chloride was then added to the solution and the dark blue precipitate was collected by vacuum filtration, washed with ethanol and dried under vacuum to give the crude product. The crude product was heated at reflux in ethanol (20 mL) for 2 h. The solution mixture

was allowed to cool to room temperature. The dark blue precipitate was collected by vacuum filtration, washed with hot ethanol and dried under vacuum to give the product as a dark blue solid (0.61 g, 0.62 mmol, 69%); mp >300.0 °C; IR (ATR):  $\nu_{\max}$  3397, 3069, 2108, 1774, 1719, 1637, 1510, 1489, 1399, 1365, 1321, 1103, 1029, 938, 803, 744, 696  $\text{cm}^{-1}$ . The spectroscopic data agree with the literature reported values <sup>1,2</sup>.

### Synthesis of cobalt<sup>II</sup> tetranitrophthalocyanine (CoTNPc)

To a suspension of cobalt sulfate heptahydrate (2.22 g, 7.90 mmol), 4-nitrophthalonitrile (5.48 g, 31.63 mmol), ammonium chloride (1.80 g, 33.73 mmol), sodium hydroxide (1.46 g, 36.50 mmol) and sodium methoxide (0.17 g, 3.05 mmol) in dimethyl sulfoxide (17 mL) was heated at 180 °C for 5 h. The dark blue reaction mixture was then allowed to cool to room temperature and the dark blue precipitate was collected by vacuum filtration and washed thrice with methanol and thrice with water to give the product as a dark blue solid (3.46 g, 4.61 mmol, 58%); mp >300.0 °C; IR (ATR):  $\nu_{\max}$  3452, 3068, 2118, 1910, 1703, 1594, 1512, 1320, 1133, 1083, 901, 842, 727  $\text{cm}^{-1}$ ; Elemental analysis: Found: C, 48.91; H, 1.84; N, 21.85%;  $\text{C}_{32}\text{H}_{12}\text{N}_{12}\text{O}_8\text{Co}\cdot 2\text{H}_2\text{O}$  requires: C, 48.80; H, 2.05; N, 21.35% <sup>3</sup>.

### Preparation of catalyst stock solution

The stock solution preparation was conducted with the degassed solvents in an anaerobic chamber (Coy Lab Inc., >95%  $\text{N}_2$ , <5%  $\text{H}_2$ ). 5 mM stock solution of MPcS and  $\text{VB}_{12}$  catalysts were anaerobically dissolved in N-methyl-2-pyrrolidone (NMP).

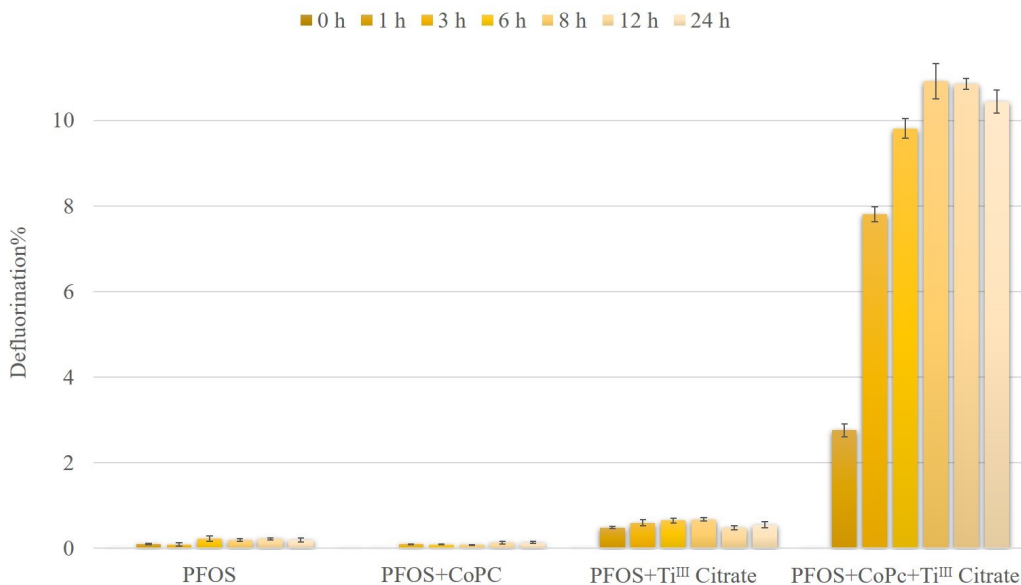

**Fig. S3.** Time course of technical PFOS defluorination under different experimental conditions at 65 °C and pH 9.0 within 24 hours. Experimental conditions: technical PFOS (0.1 mM), CoPc (0.25 mM),  $\text{Ti}^{\text{III}}$  citrate (40 mM), and carbonate buffer (85 mM) in Milli Q water.

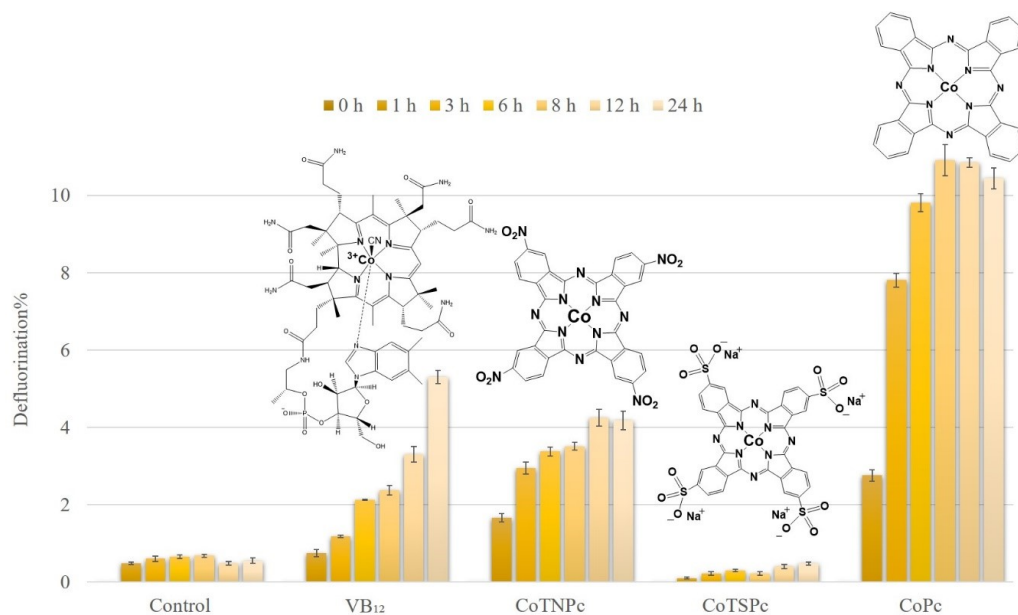

**Fig. S4.** Time course of technical PFOS defluorination via cobalt phthalocyanine derivatives or VB<sub>12</sub> in Ti<sup>III</sup> citrate at 65 °C and pH 9.0. Experimental conditions: Technical PFOS (0.1 mM), catalyst (0.25 mM), Ti<sup>III</sup> citrate (40 mM), and carbonate buffer (85 mM) in Milli Q water.

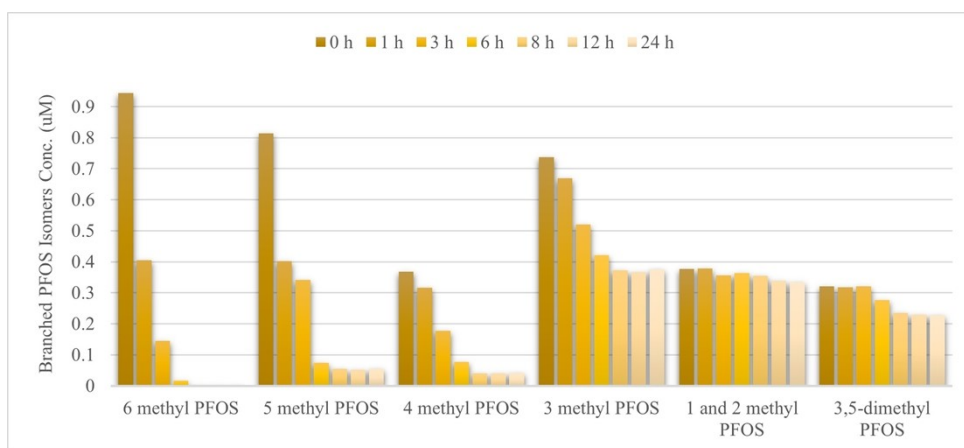

**Fig. S5.** Time course of branched PFOS isomers degradation in CoPc-Ti<sup>III</sup> citrate system at 65 °C and pH 9.0. Experimental conditions: Technical PFOS (18.6 μM), catalyst (0.25 mM), Ti<sup>III</sup> citrate (40 mM), and carbonate buffer (85 mM) in Milli Q water.

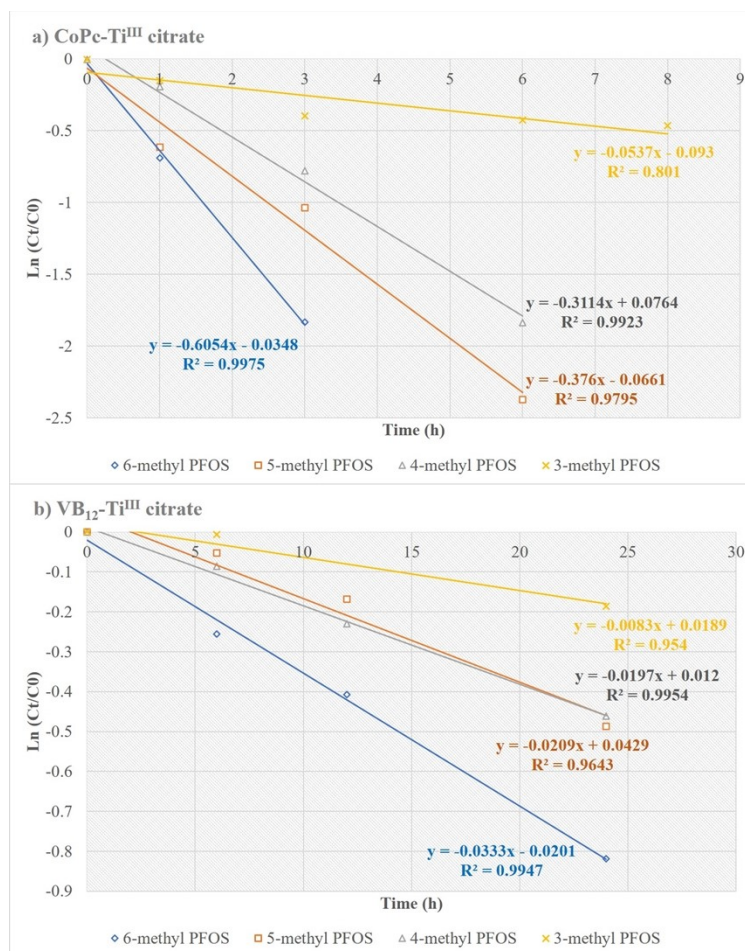

**Fig. S6.** Natural logarithm of the concentration ratio ( $C_t/C_0$ ) when times are  $t$  and  $0$  which is related to the specific branched isomers for a) CoPc-Ti<sup>III</sup> citrate system and b) VB<sub>12</sub>-Ti<sup>III</sup> citrate system. Experimental conditions: Technical PFOS (0.1 mM), CoPc/VB<sub>12</sub> (0.25 mM), Ti<sup>III</sup> citrate (40 mM), and carbonate buffer (85 mM) at 65 °C.

RT: 4.64 - 12.29

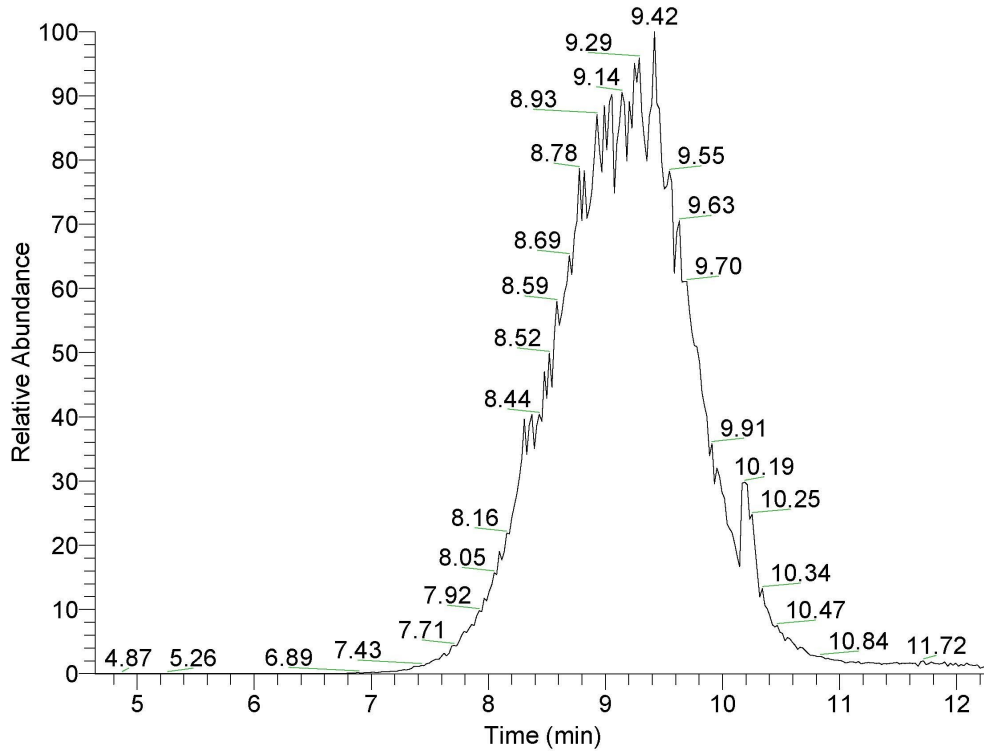

NL: 1.04E8  
m/z=  
498.9191-498.9391 F:  
FTMS - p ESI Full ms  
[85.0000-1275.0000]  
MS Stock50ppmPFOS

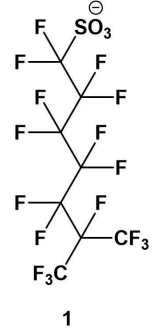

Stock50ppmPFOS #4720 RT: 9.35 AV: 1 NL: 8.17E7  
T: FTMS - p ESI Full ms [85.0000-1275.0000]

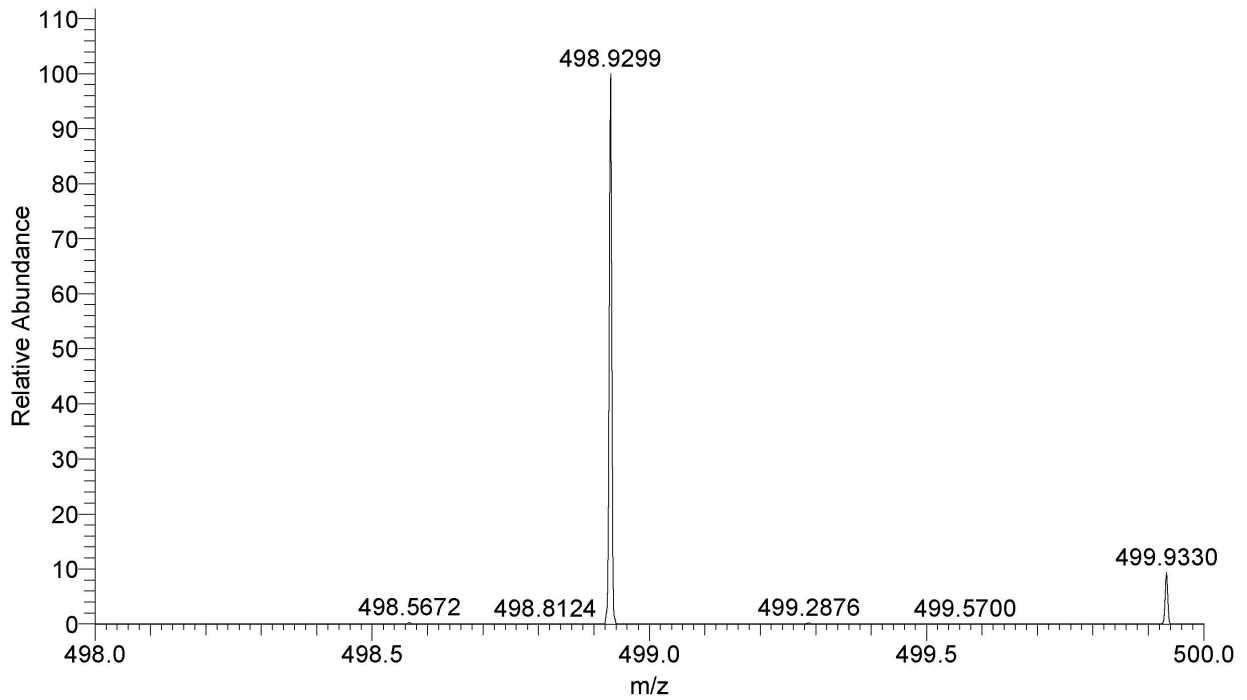

RT: 4.64 - 12.29

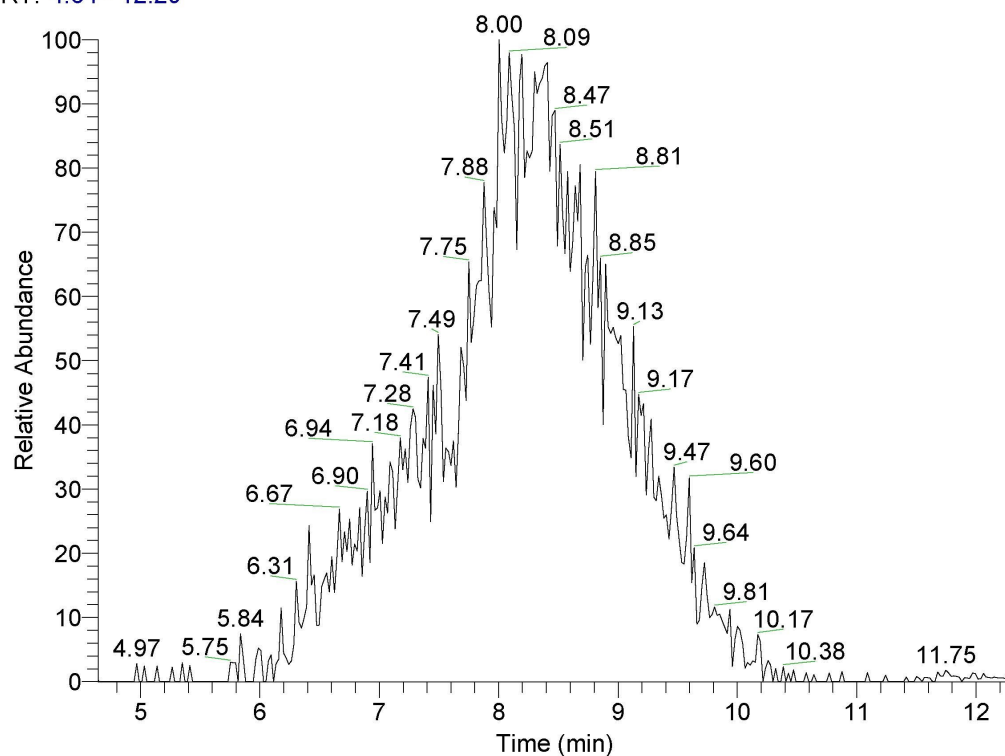

NL: 5.26E5  
m/z=  
480.9285-480.9485  
F: FTMS - p ESI Full  
ms  
[85.0000-  
1275.0000] MS  
Co-Ti-3h

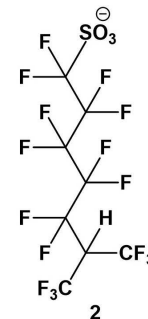

Co-Ti-3h #4247 RT: 8.28 AV: 1 NL: 4.18E5  
T: FTMS - p ESI Full ms [85.0000-1275.0000]

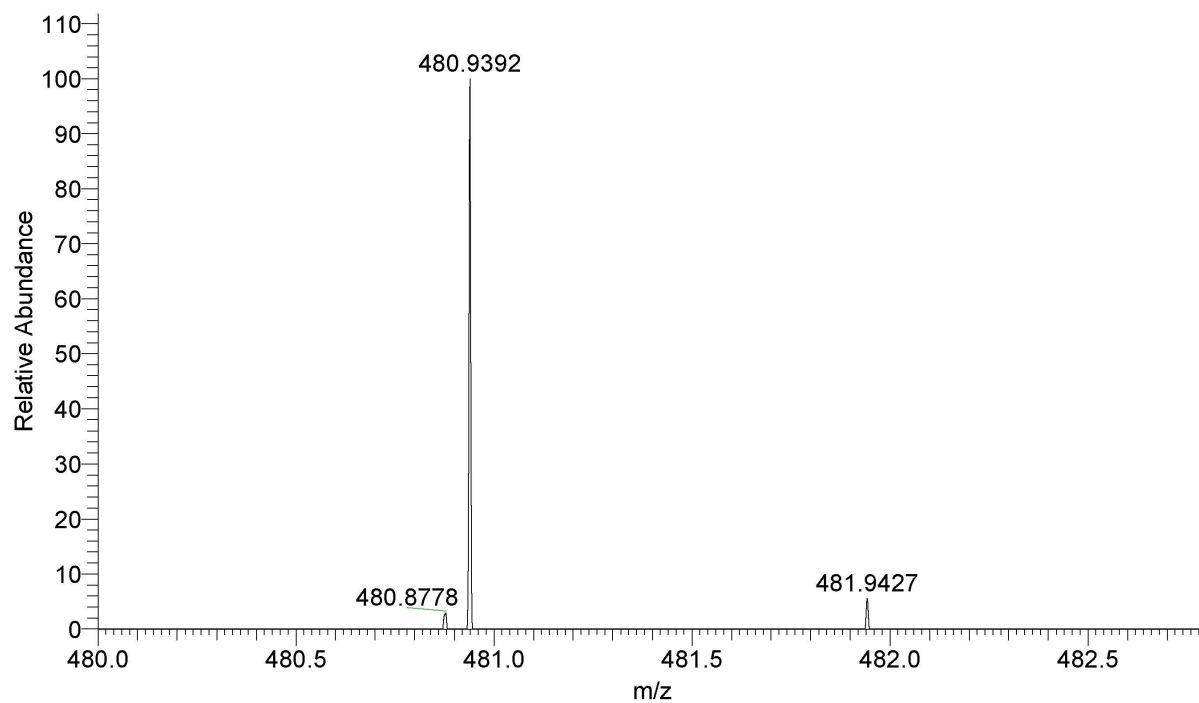

RT: 4.64 - 12.29

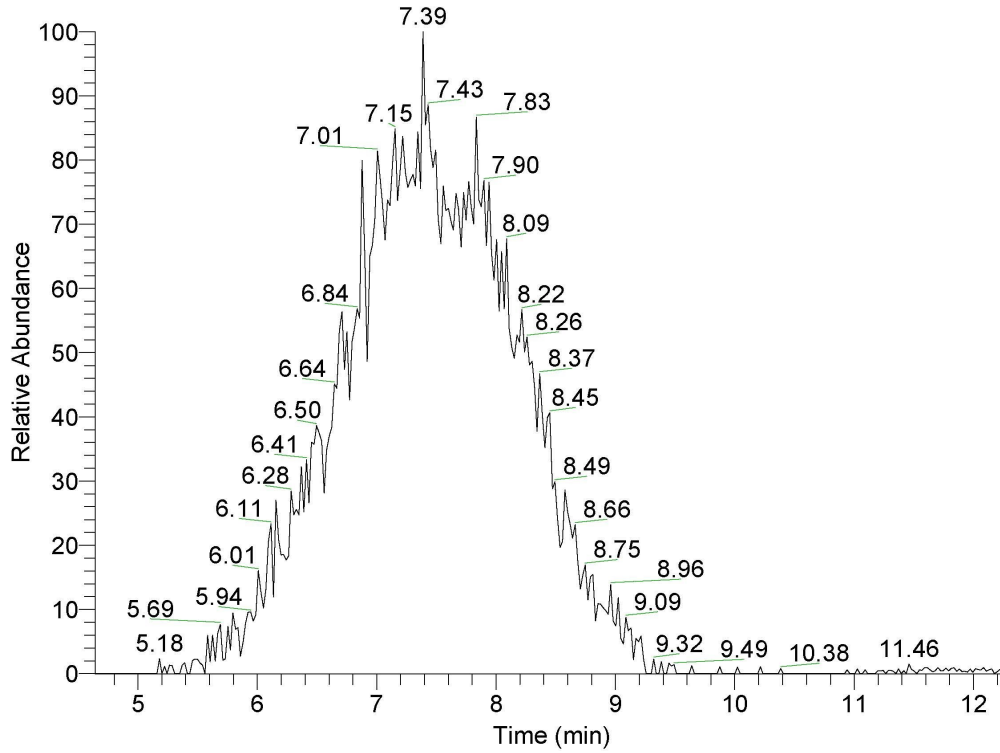

NL: 1.01E6  
m/z=  
460.9223-460.9423  
F: FTMS - p ESI Full  
ms  
[85.0000-  
1275.0000] MS  
Co-Ti-3h

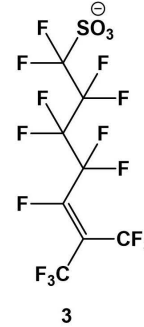

Co-Ti-3h #4170 RT: 8.13 AV: 1 NL: 5.09E5  
T: FTMS - p ESI Full ms [85.0000-1275.0000]

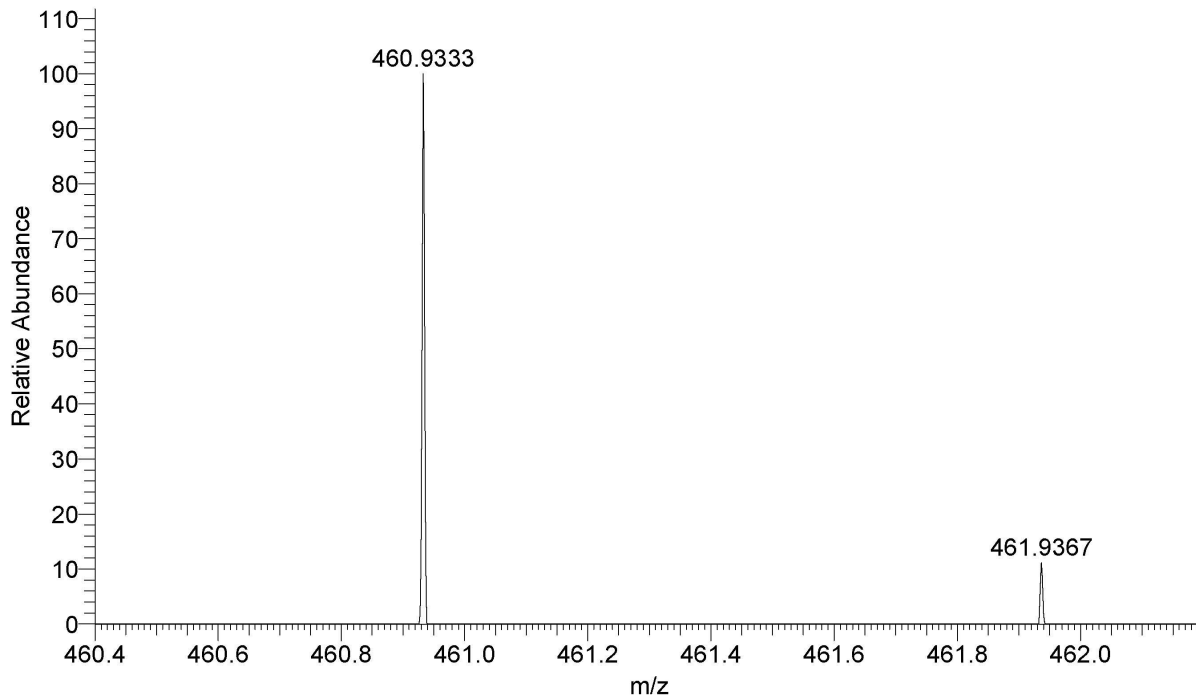

RT: 1.00 - 12.00

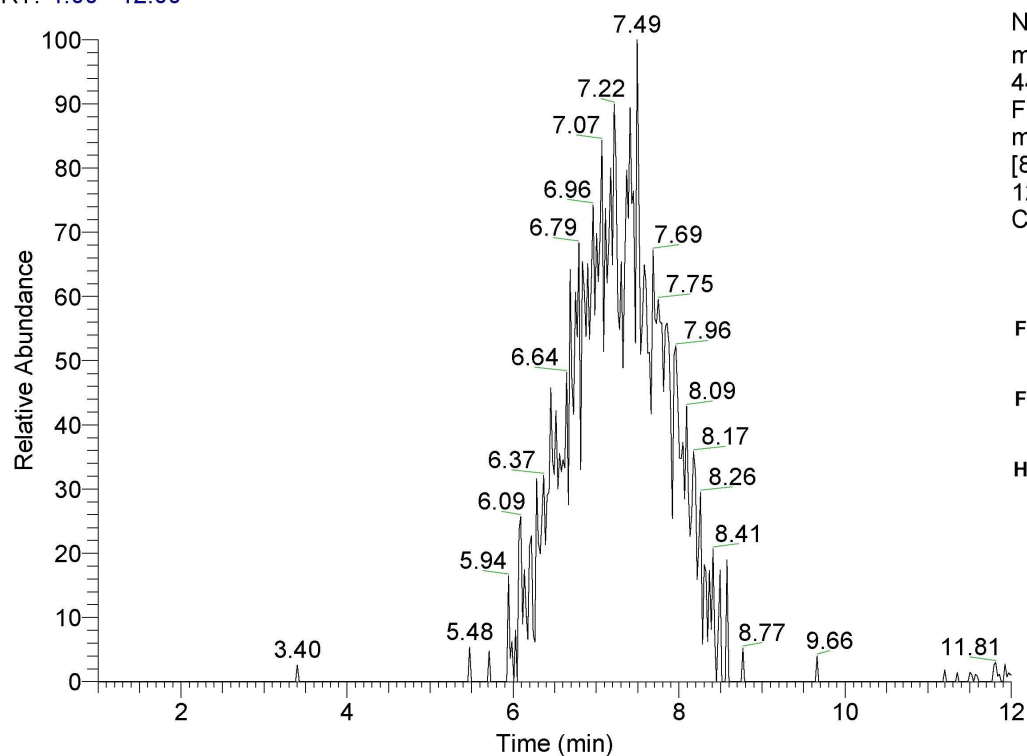

NL: 2.66E5  
m/z=  
442.9317-442.9517  
F: FTMS - p ESI Full  
ms  
[85.0000-  
1275.0000] MS  
Co-Ti-3h

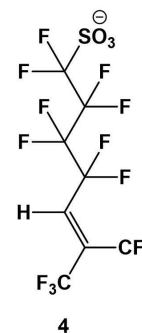

Co-Ti-3h #9230 RT: 18.31 AV: 1 NL: 1.87E5  
T: FTMS - p ESI Full ms [85.0000-1275.0000]

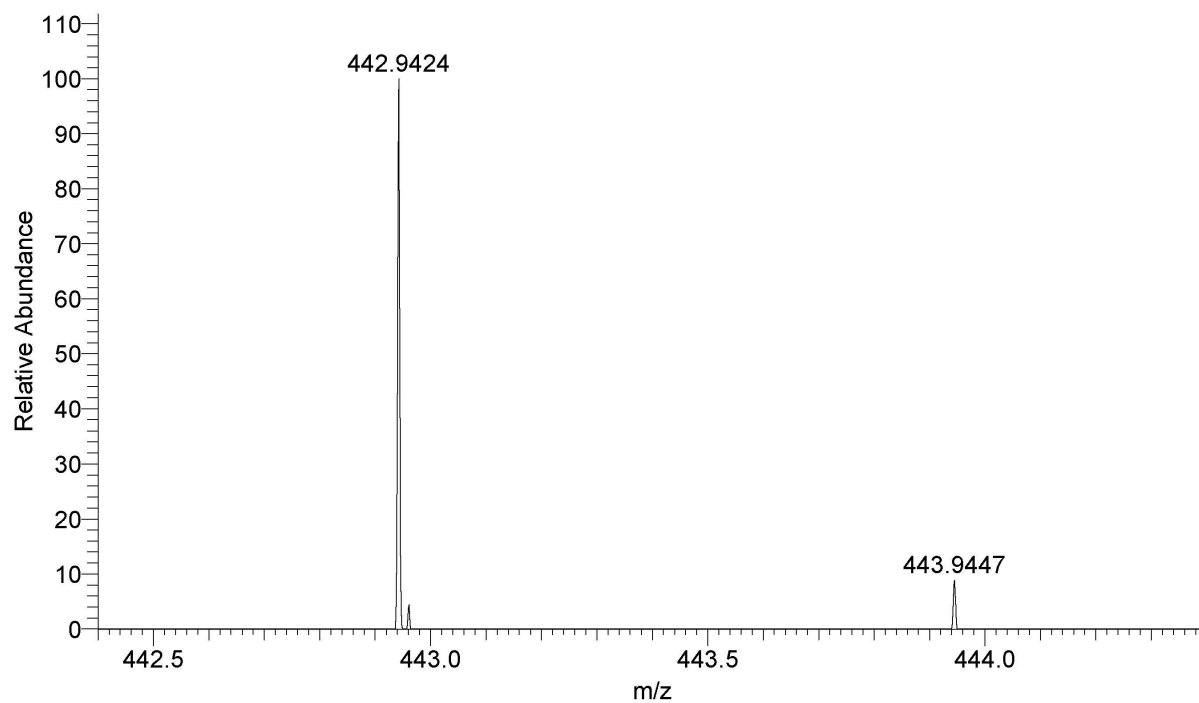



RT: 13.50 - 17.00

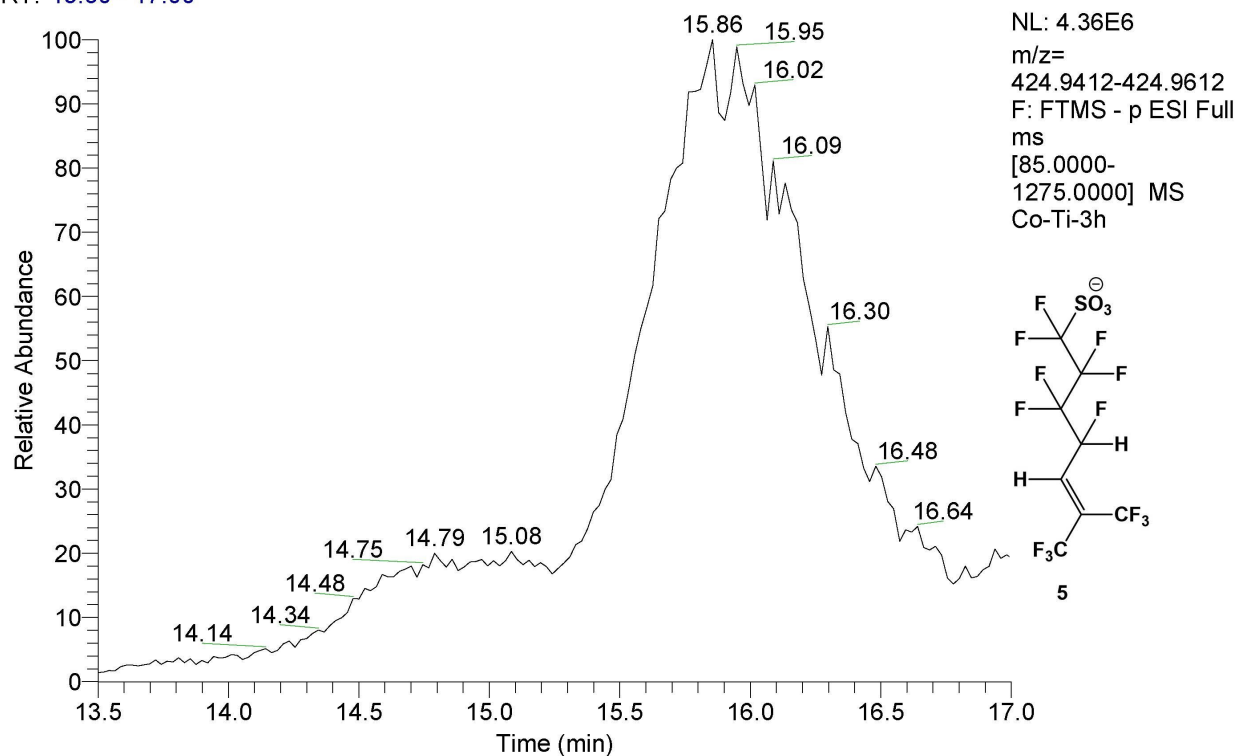

Co-Ti-3h #8075 RT: 15.93 AV: 1 NL: 3.89E6  
T: FTMS - p ESI Full ms [85.0000-1275.0000]

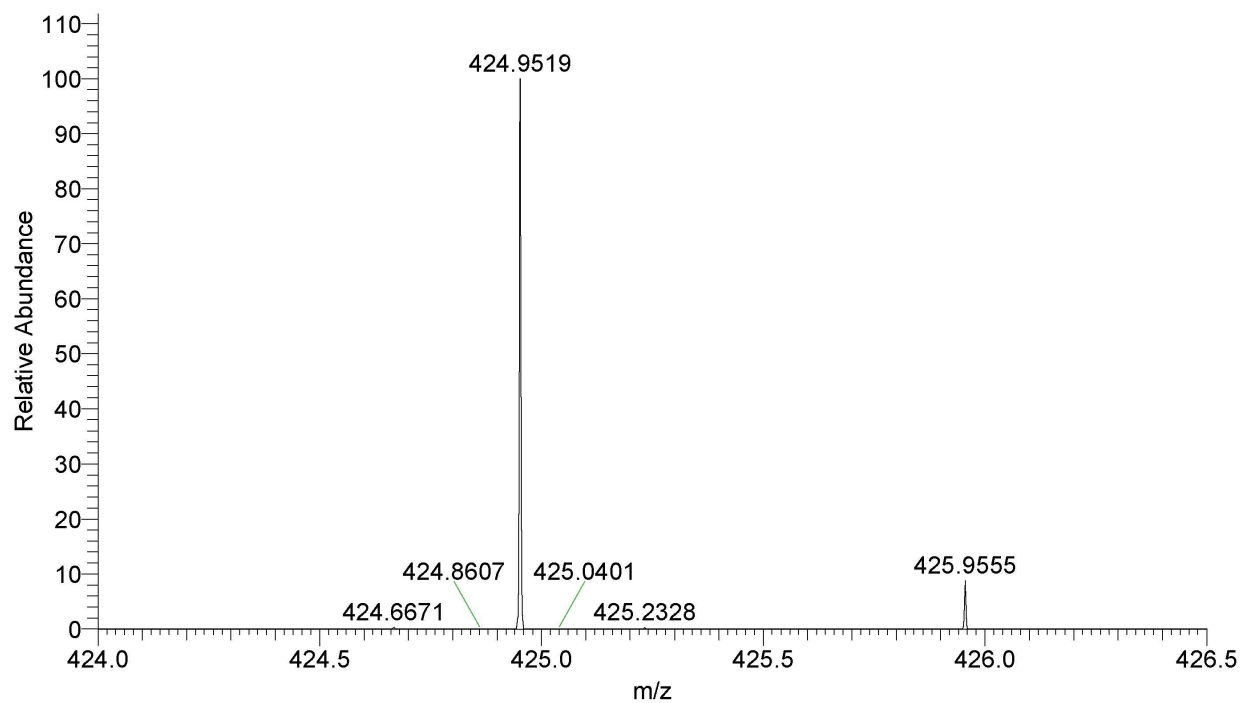

RT: 14.20 - 16.00

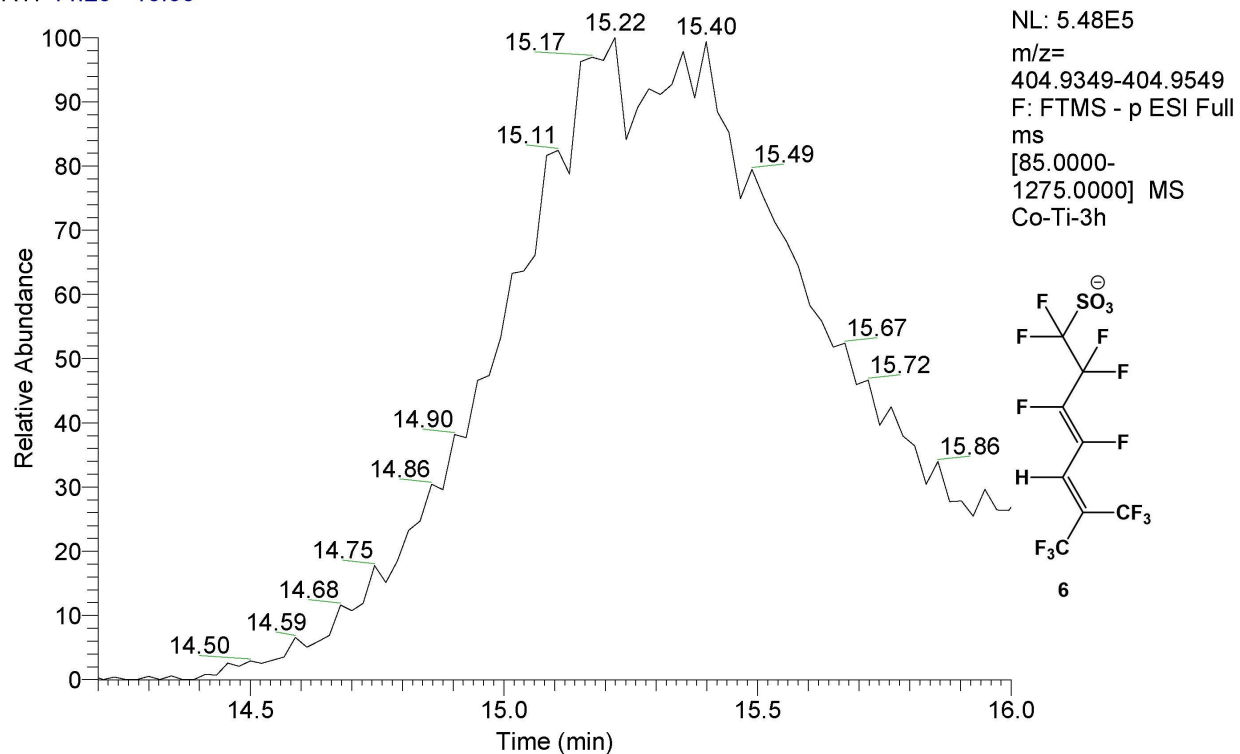

Co-Ti-3h #8559 RT: 16.94 AV: 1 NL: 4.98E5  
T: FTMS - p ESI Full ms [85.0000-1275.0000]

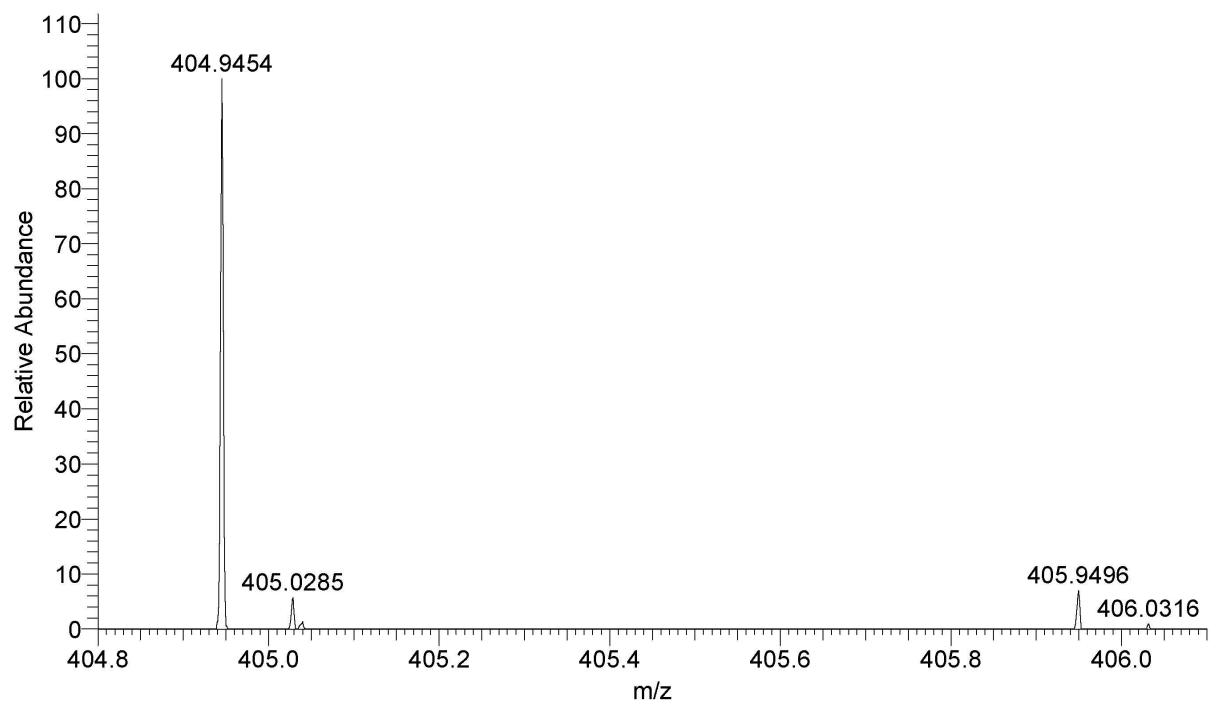





RT: 0.00 - 20.00

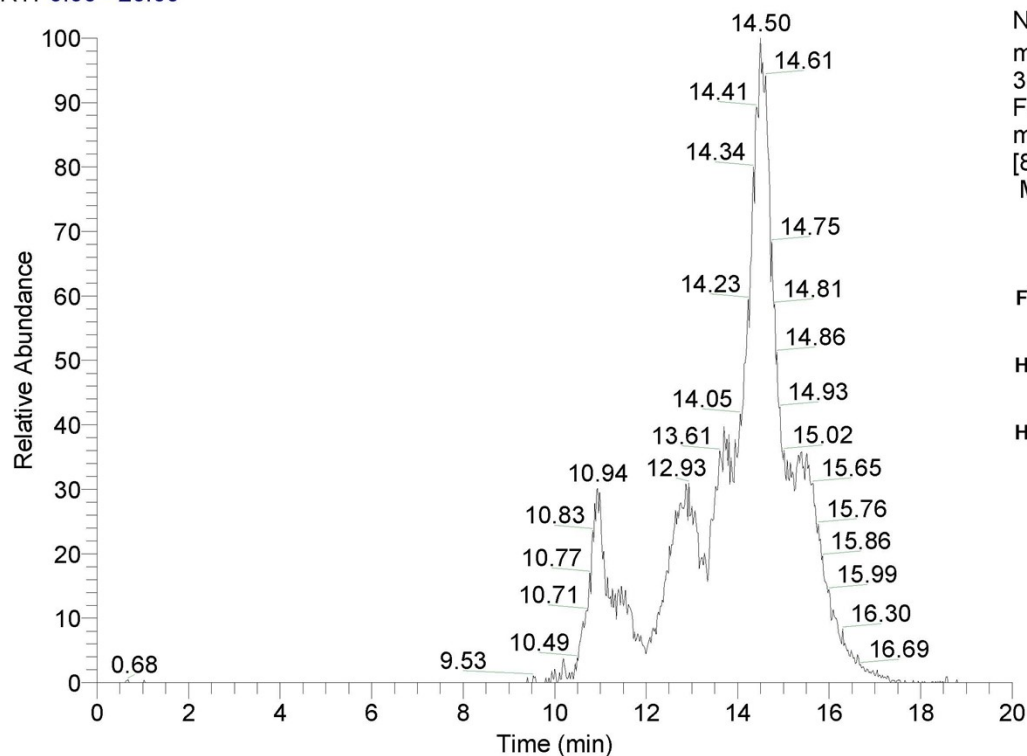

NL: 1.79E6

m/z=

350.9632-350.9832

F: FTMS - p ESI Full

ms

[85.0000-1275.0000]

MS Co-Ti-3h

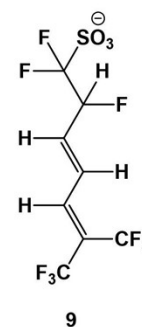

9

Co-Ti-3h #6557 RT: 12.82 AV: 1 NL: 4.59E5

T: FTMS - p ESI Full ms [85.0000-1275.0000]

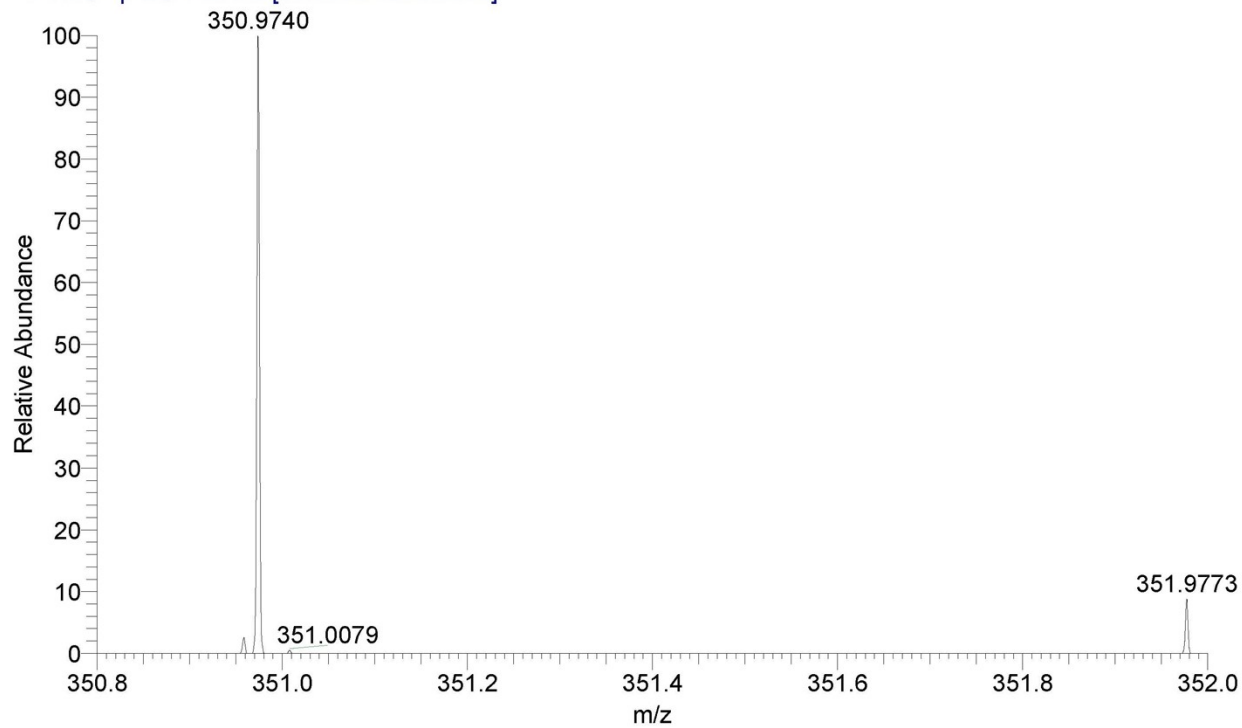

RT: 0.00 - 20.00

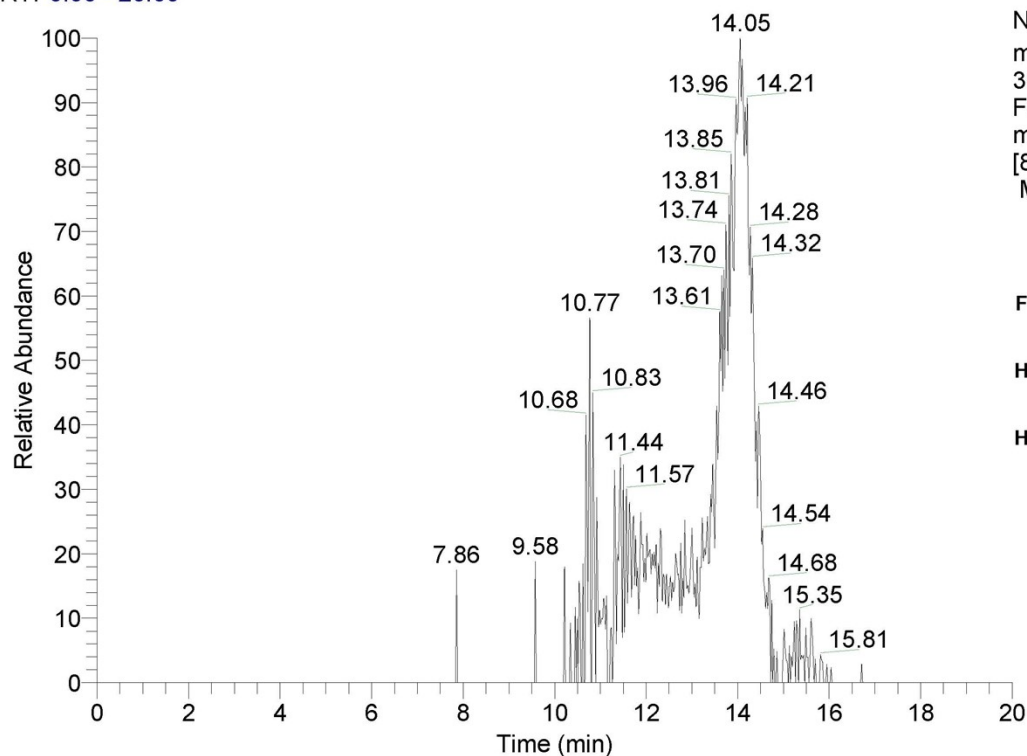

NL: 7.00E4

m/z=

330.9570-330.9770

F: FTMS - p ESI Full

ms

[85.0000-1275.0000]

MS Co-Ti-3h

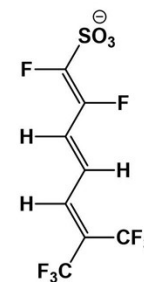

10

Co-Ti-3h #7107 RT: 13.94 AV: 1 NL: 5.65E4

T: FTMS - p ESI Full ms [85.0000-1275.0000]

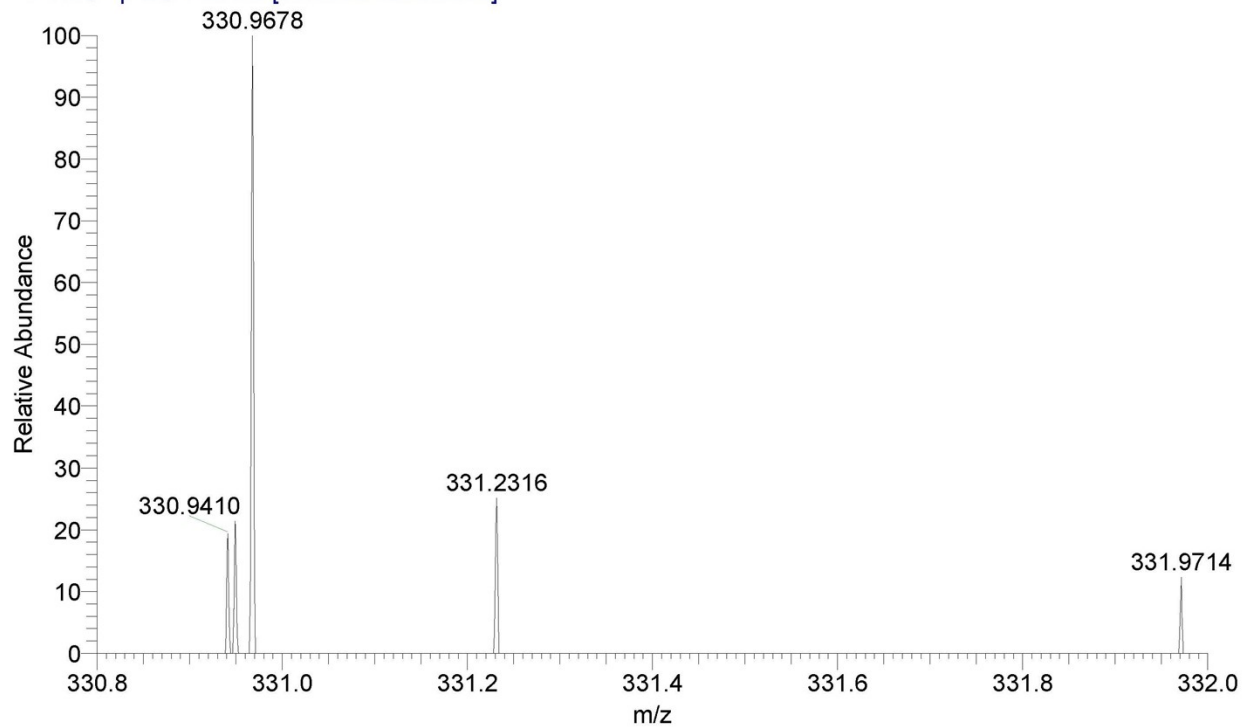

RT: 16.00 - 18.00

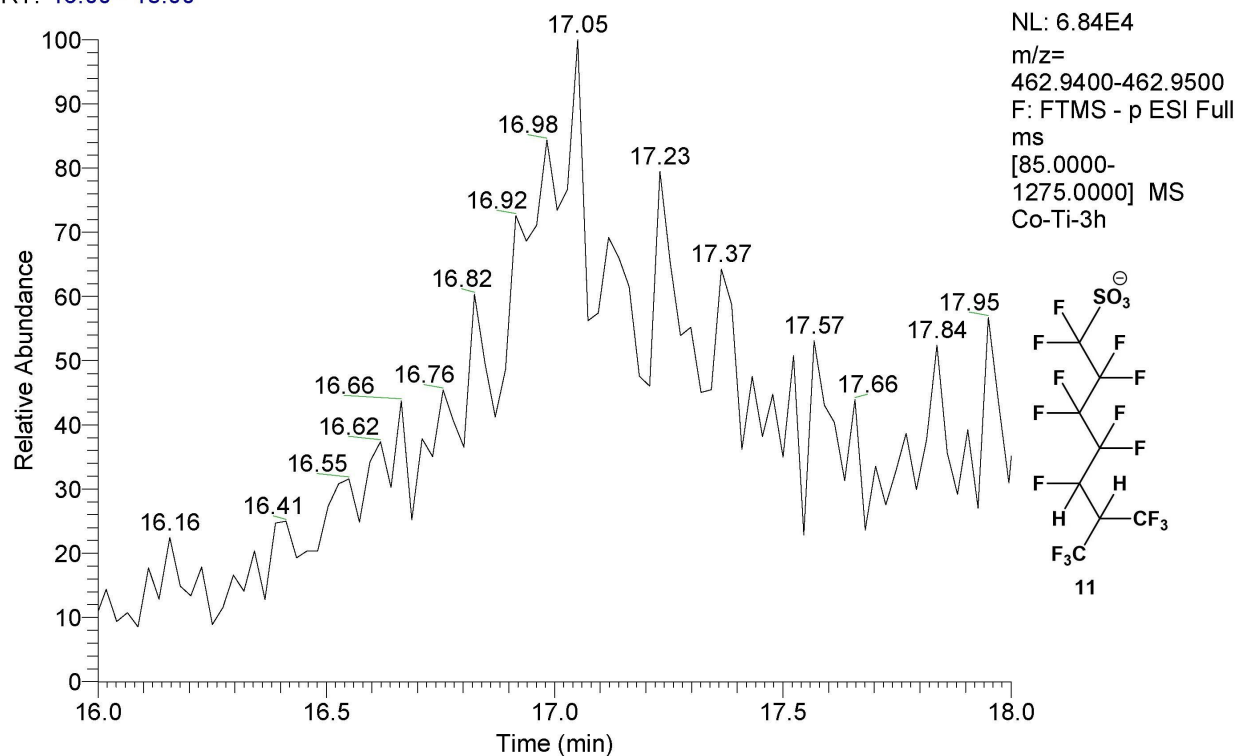

Co-Ti-3h #8339 RT: 16.48 AV: 1 NL: 1.35E4  
T: FTMS - p ESI Full ms [85.0000-1275.0000]

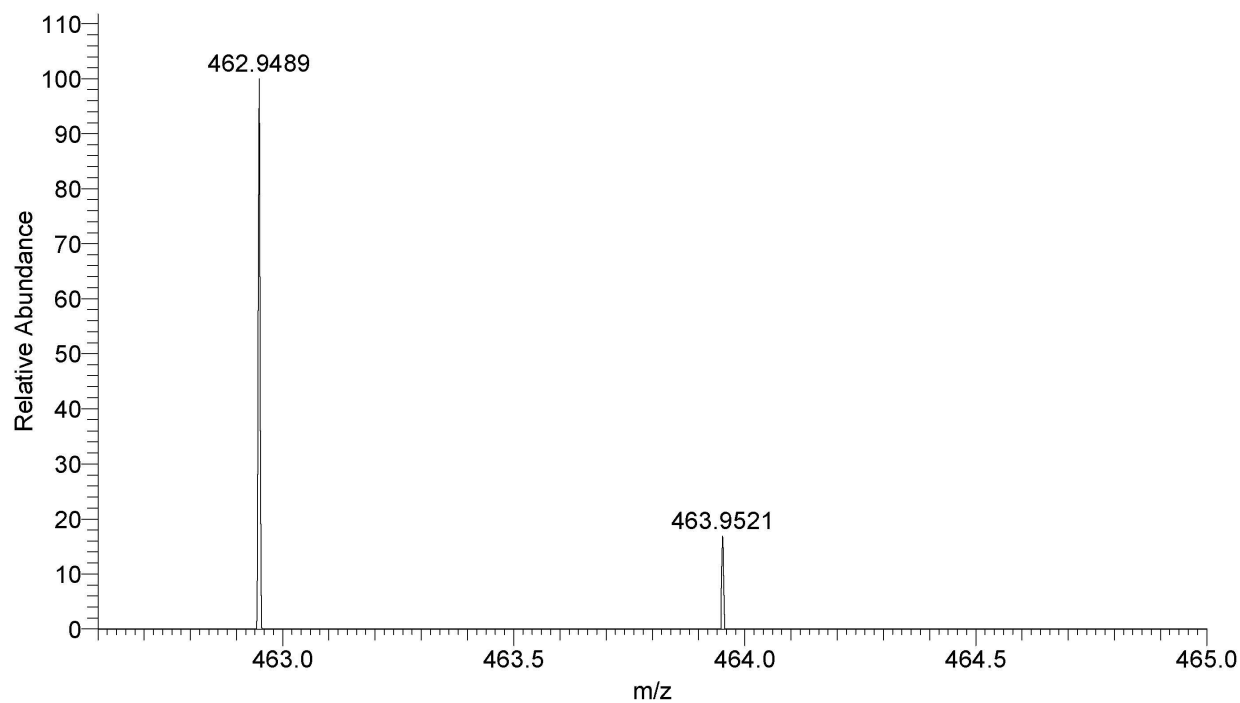

RT: 13.00 - 20.00

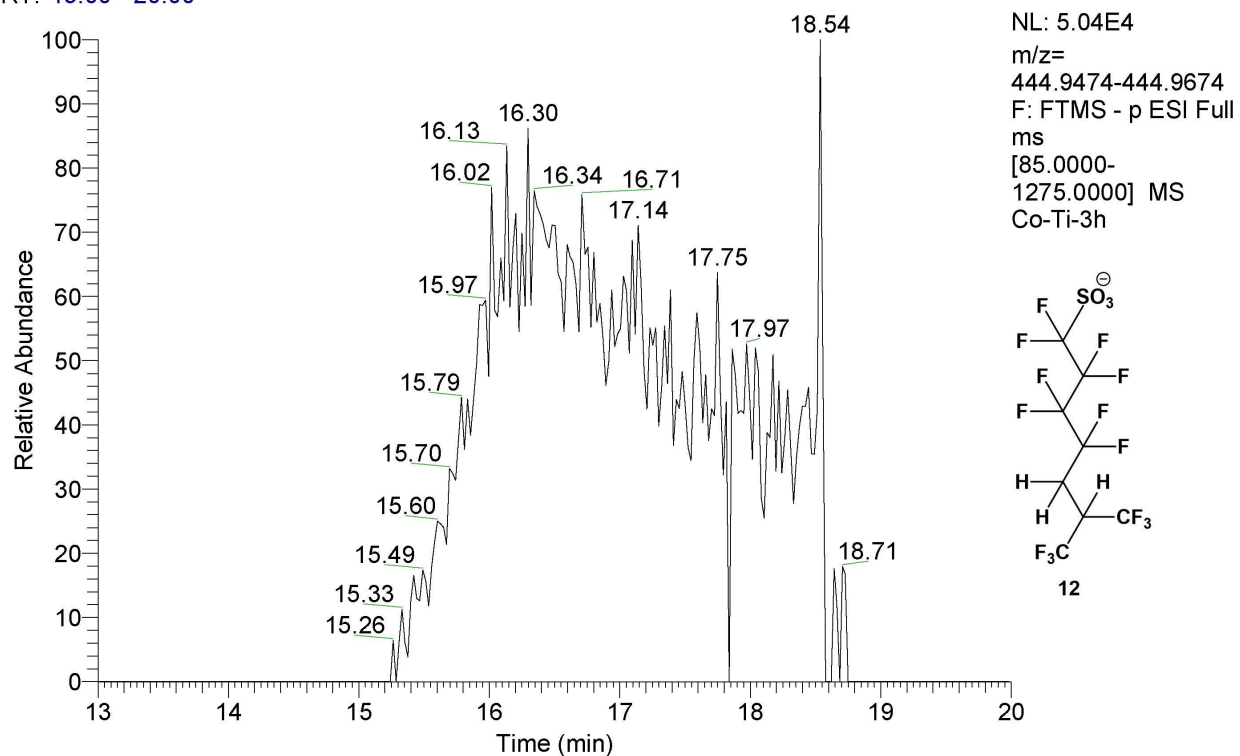

Co-Ti-3h #8262 RT: 16.32 AV: 1 NL: 2.80E4  
T: FTMS - p ESI Full ms [85.0000-1275.0000]

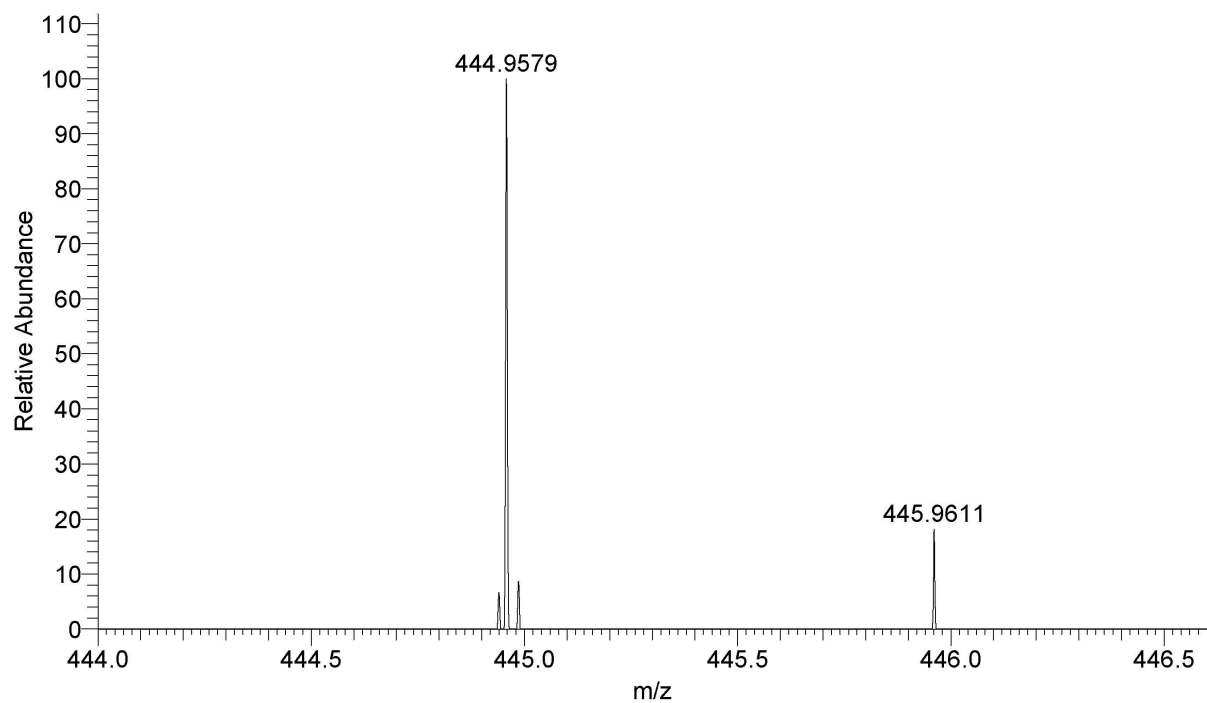



RT: 12.50 - 14.40

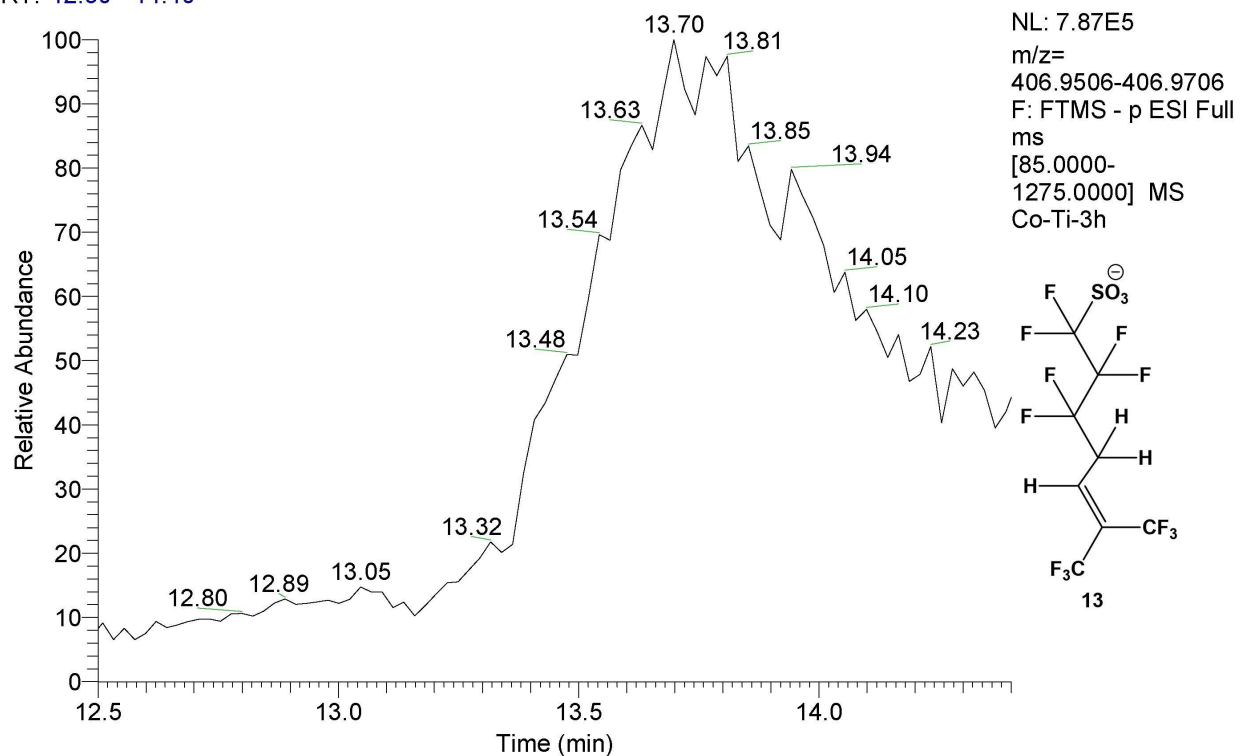

Co-Ti-3h #7866 RT: 15.49 AV: 1 NL: 6.30E5  
T: FTMS - p ESI Full ms [85.0000-1275.0000]

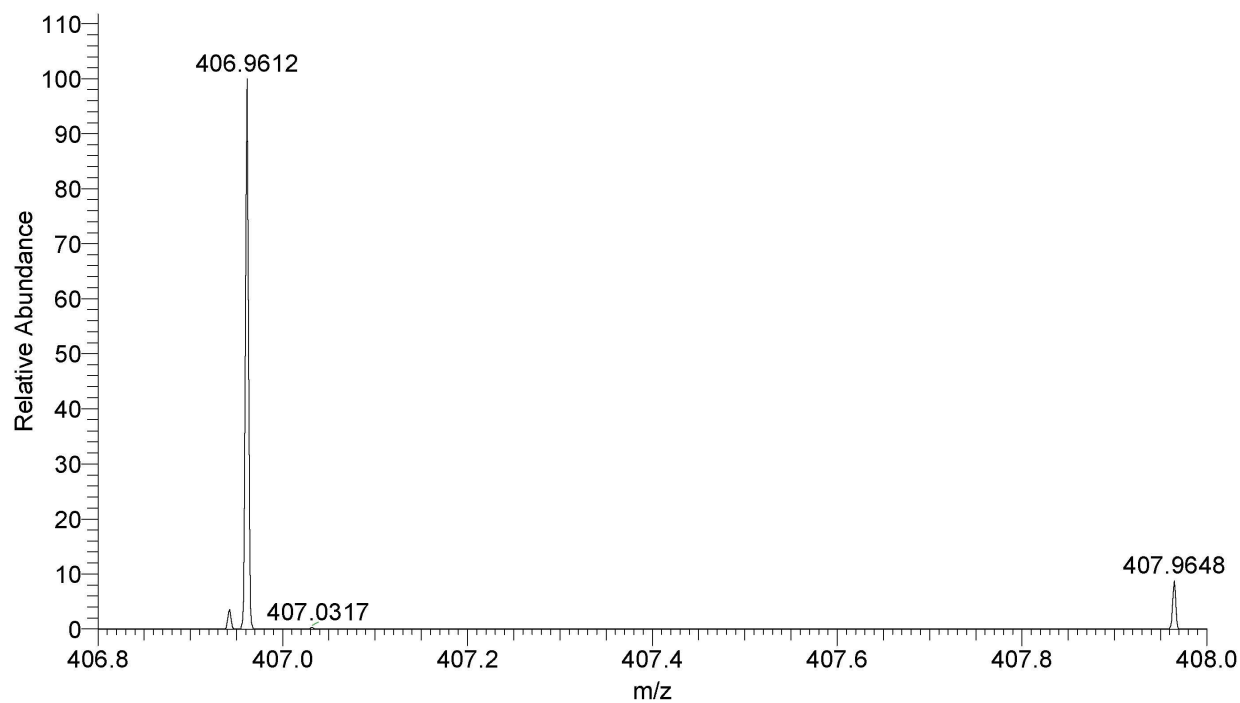

RT: 14.80 - 16.00

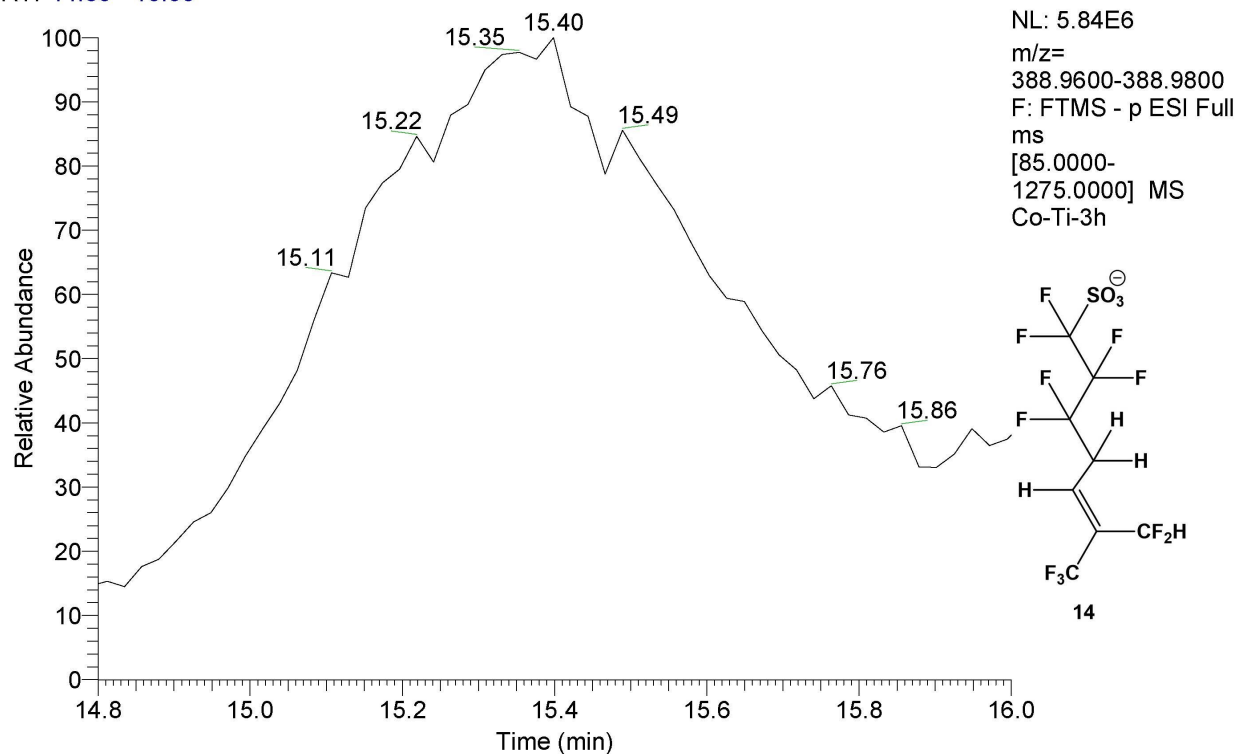

Co-Ti-3h #7370-8240 RT: 14.48-16.27 AV: 80 NL: 2.58E6  
T: FTMS - p ESI Full ms [85.0000-1275.0000]

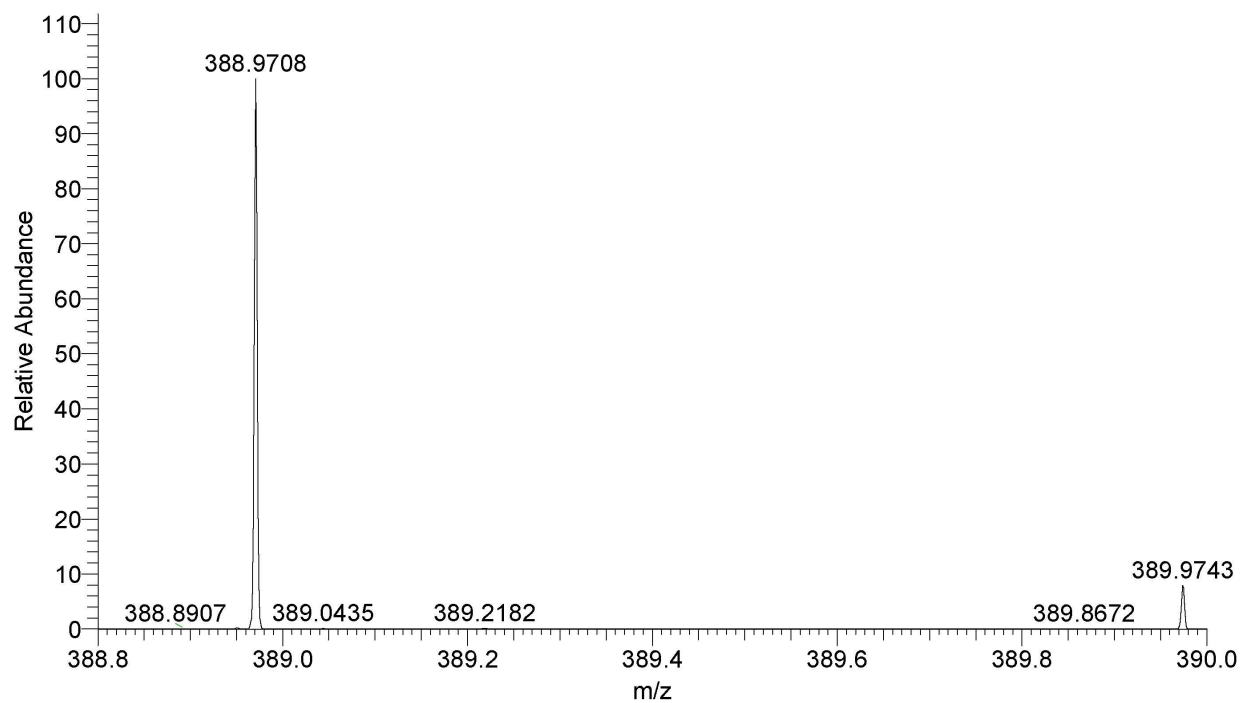

RT: 14.50 - 17.50

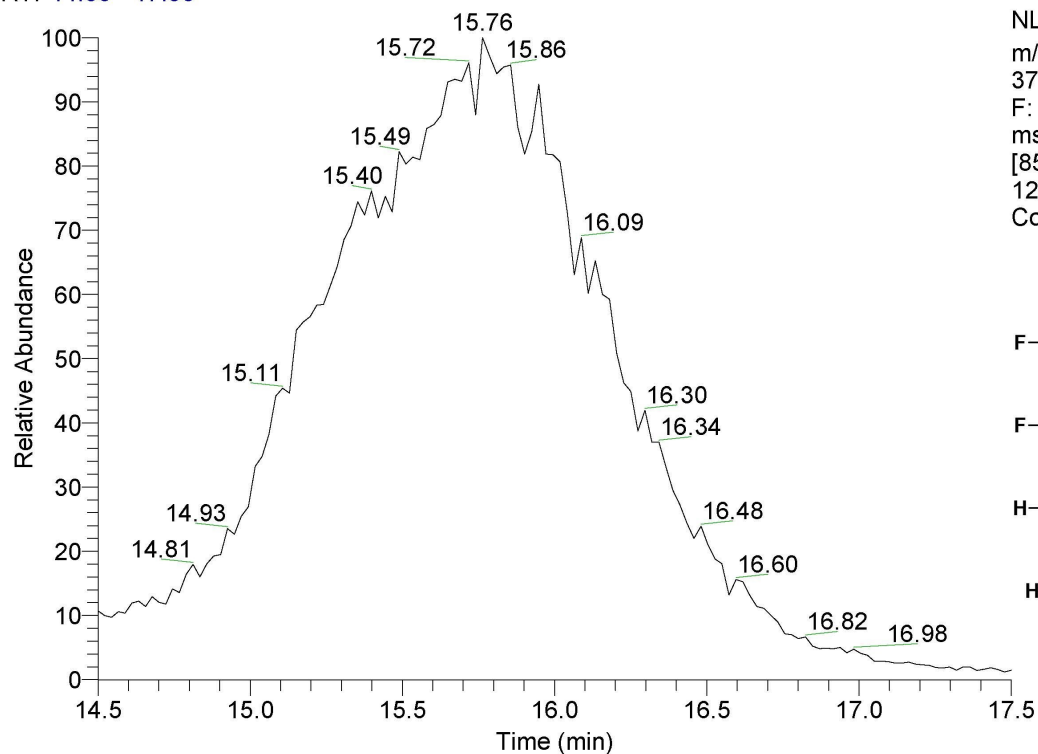

NL: 2.85E6  
m/z=  
370.9694-370.9894  
F: FTMS - p ESI Full  
ms  
[85.0000-  
1275.0000] MS  
Co-Ti-3h

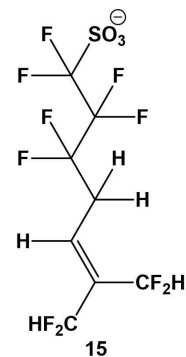

Co-Ti-3h #7074 RT: 13.88 AV: 1 NL: 9.18E5  
T: FTMS - p ESI Full ms [85.0000-1275.0000]

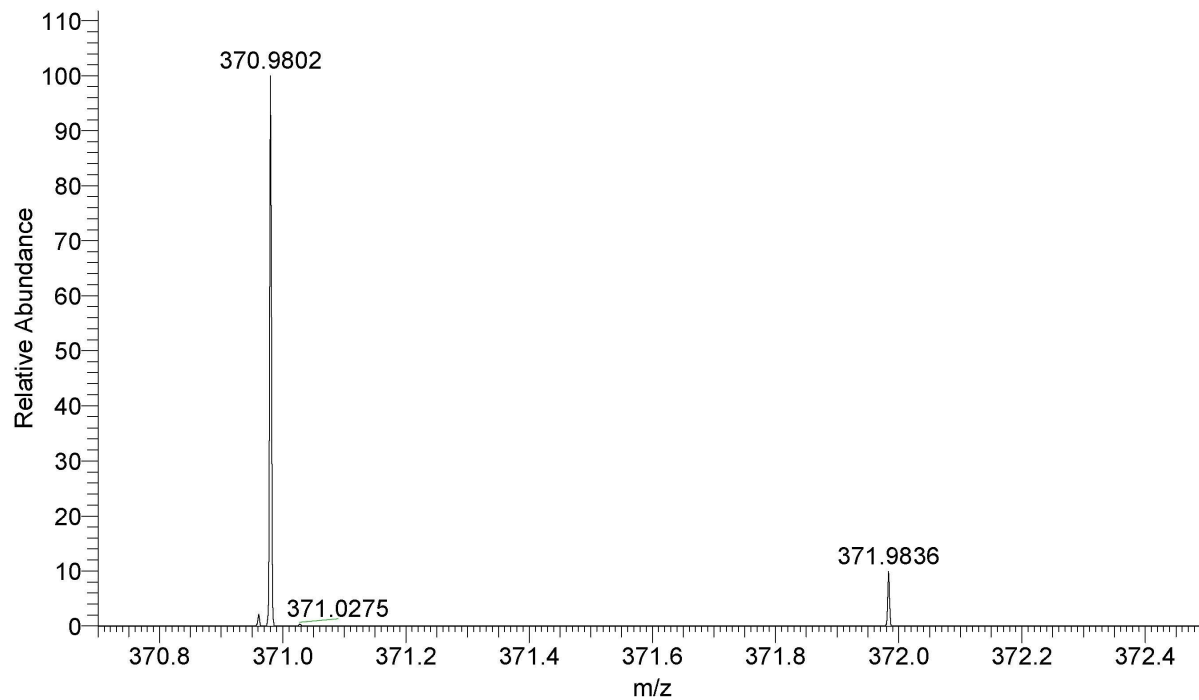

RT: 0.00 - 20.00

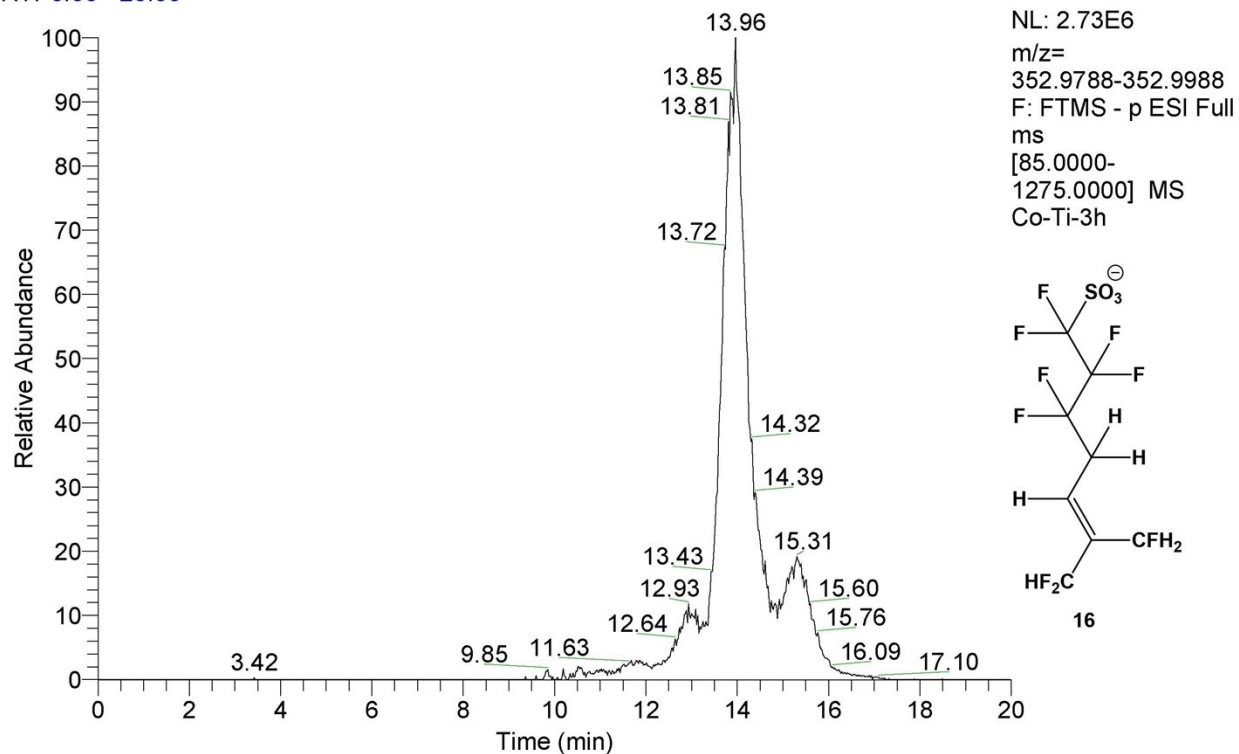

Co-Ti-3h #7844 RT: 15.44 AV: 1 NL: 4.40E5  
T: FTMS - p ESI Full ms [85.0000-1275.0000]

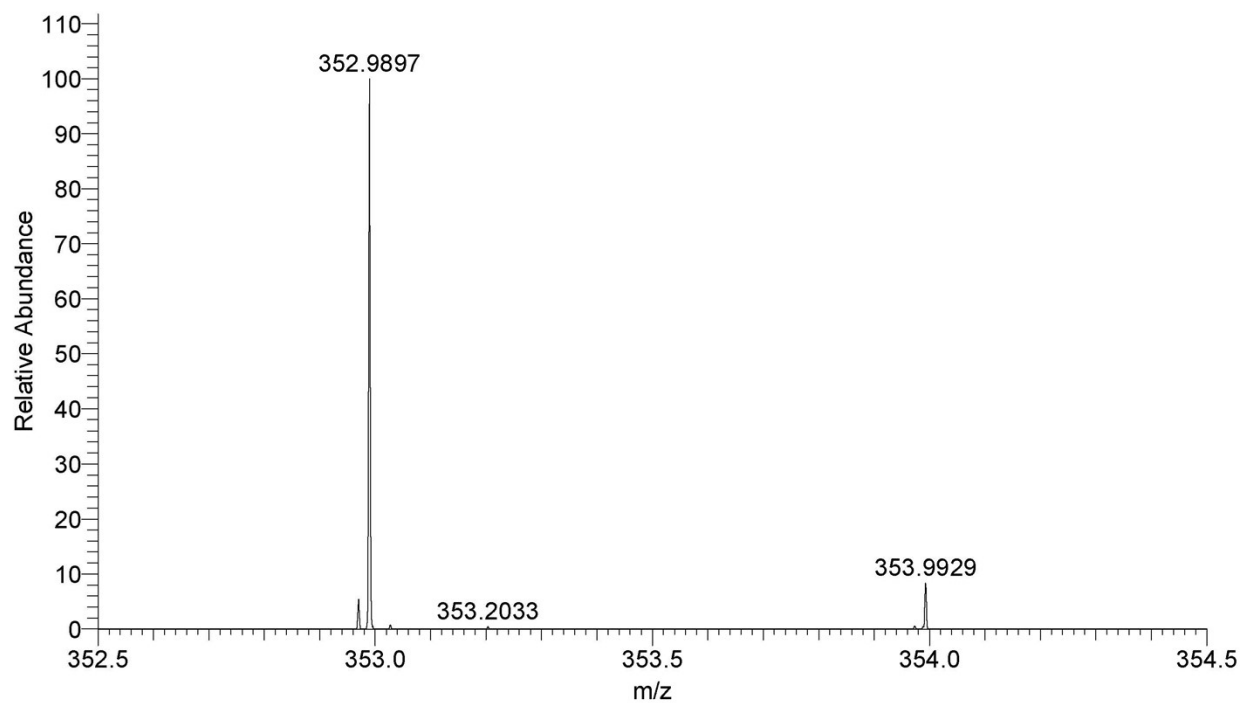

RT: 0.00 - 20.00

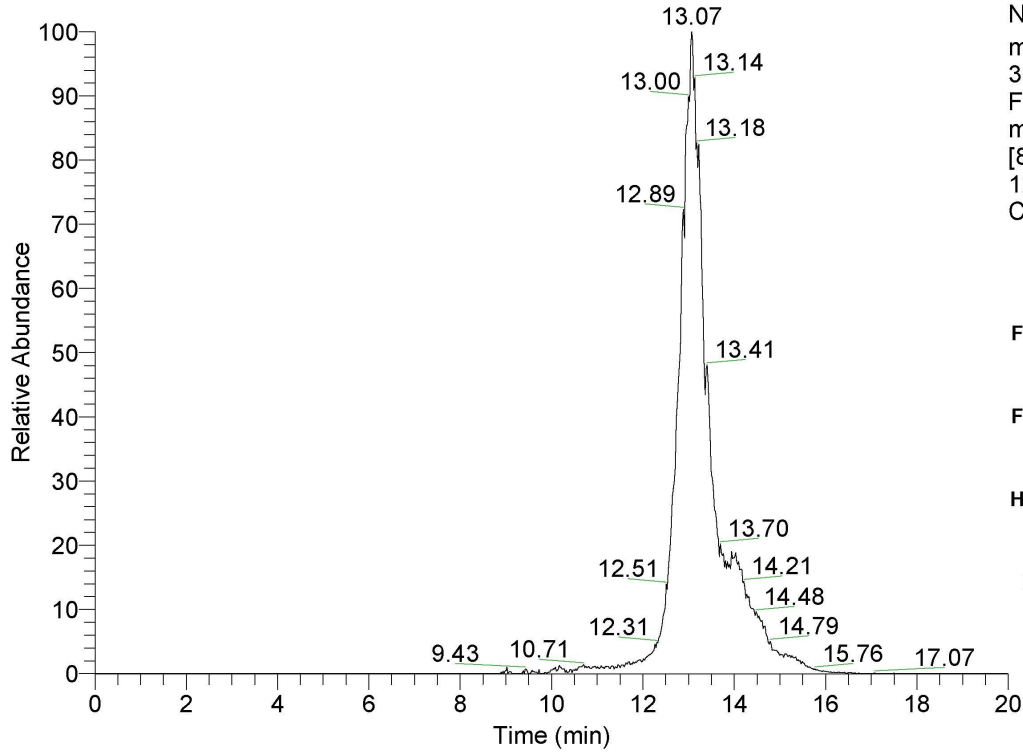

NL: 6.39E6  
m/z=  
334.9883-335.0083  
F: FTMS - p ESI Full  
ms  
[85.0000-  
1275.0000] MS  
Co-Ti-3h

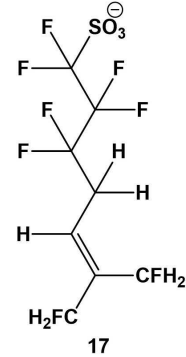

Co-Ti-3h #6667 RT: 13.05 AV: 1 NL: 5.99E6  
T: FTMS - p ESI Full ms [85.0000-1275.0000]

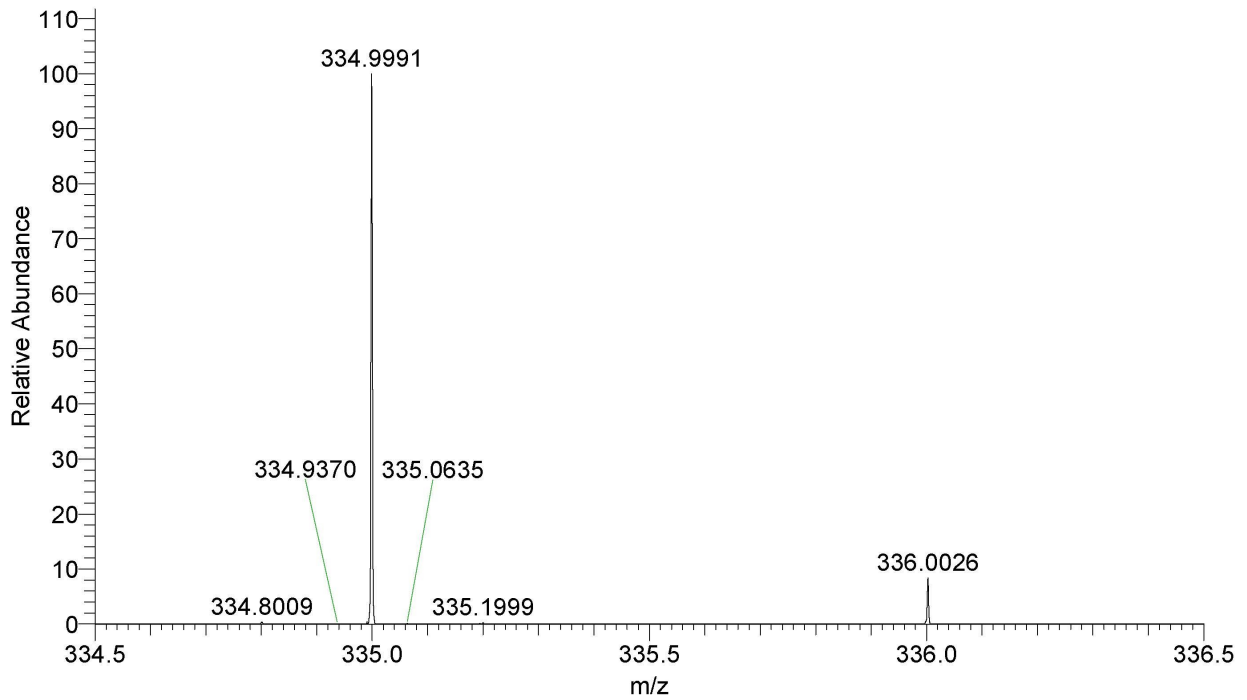

RT: 8.00 - 12.00

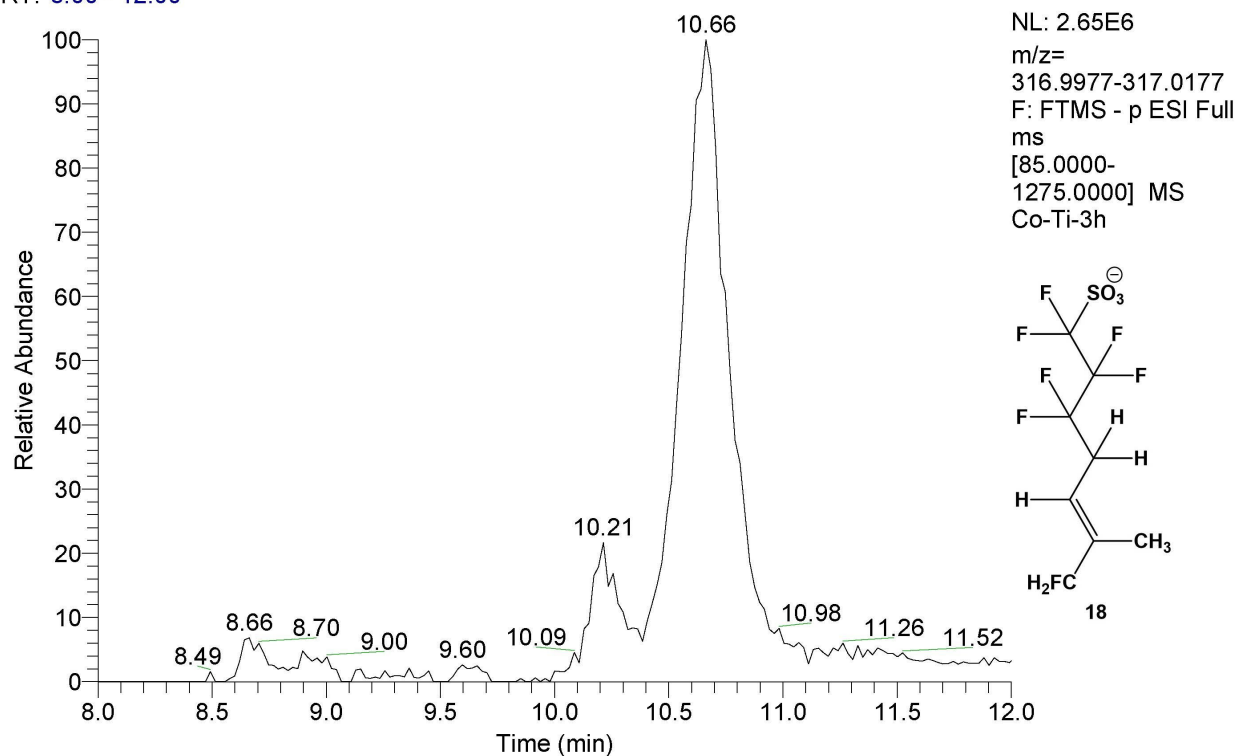

Co-Ti-3h #5479 RT: 10.66 AV: 1 NL: 2.61E6  
T: FTMS - p ESI Full ms [85.0000-1275.0000]

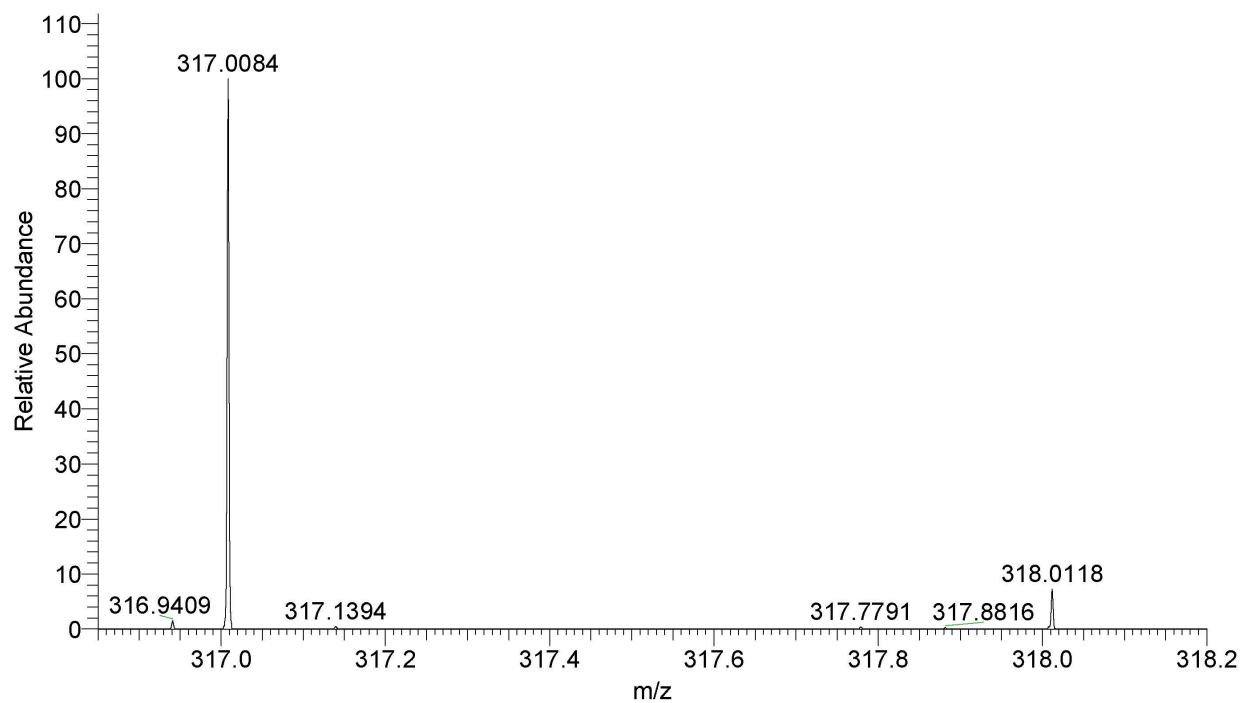

RT: 12.00 - 17.00

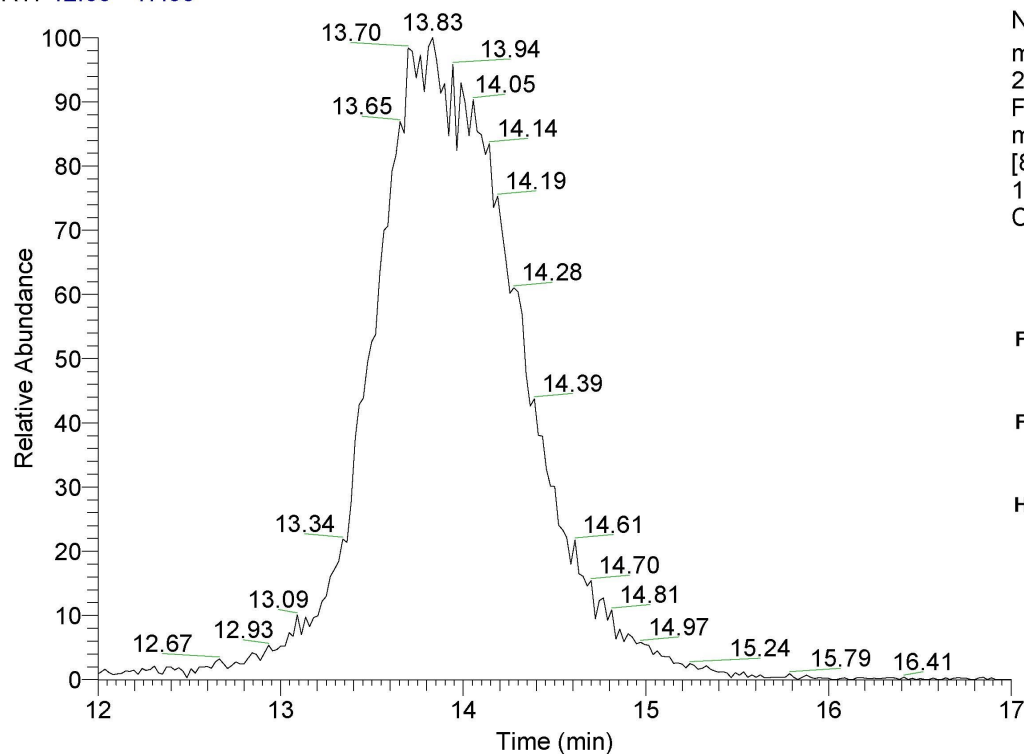

NL: 7.90E5  
m/z=  
299.0071-299.0271  
F: FTMS - p ESI Full  
ms  
[85.0000-  
1275.0000] MS  
Co-Ti-3h

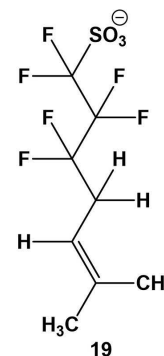

Co-Ti-3h #7063 RT: 13.85 AV: 1 NL: 7.53E5  
T: FTMS - p ESI Full ms [85.0000-1275.0000]

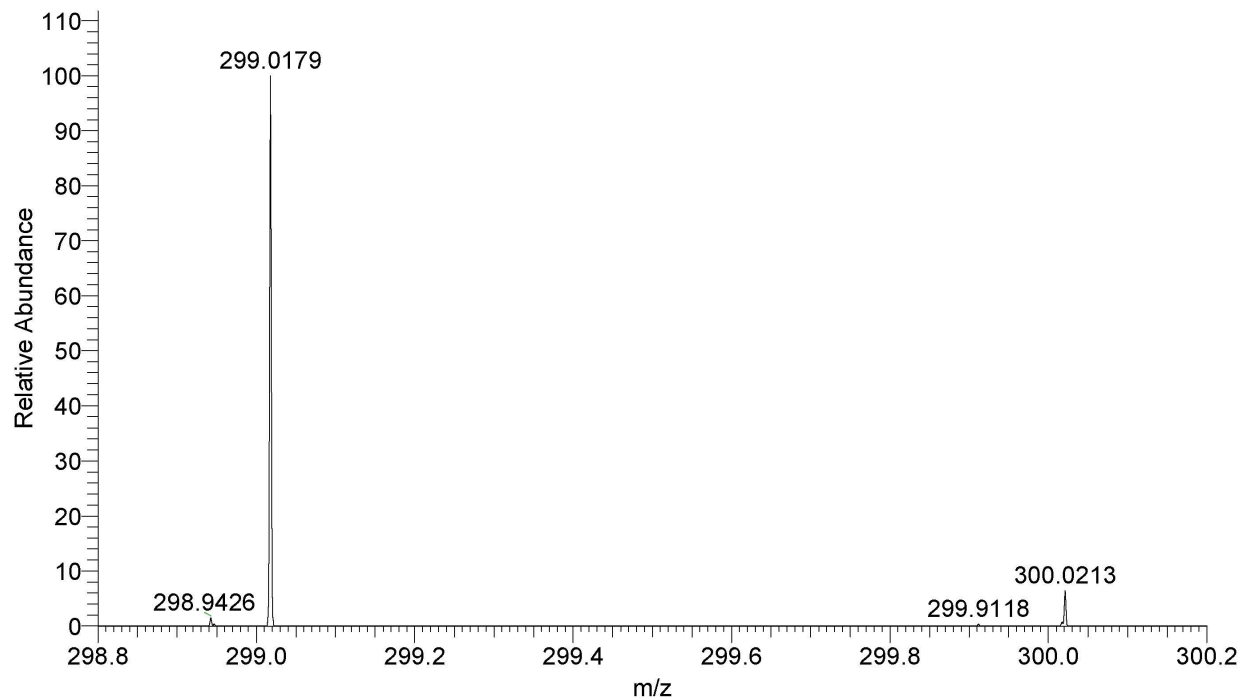

RT: 11.00 - 17.00

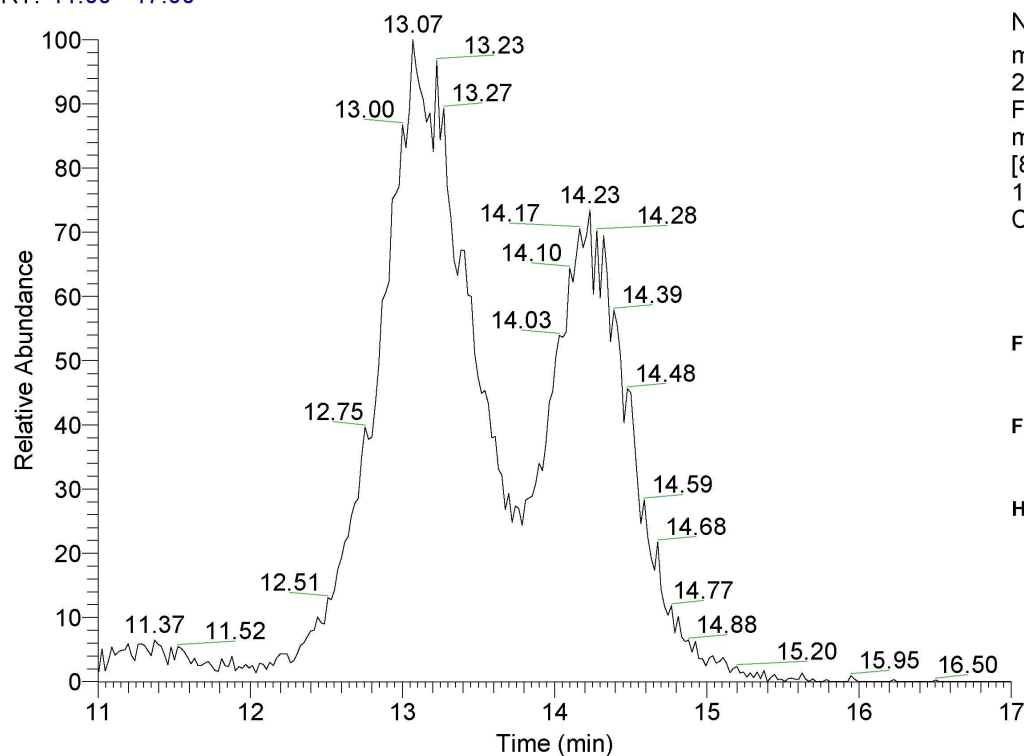

NL: 5.13E5  
m/z=  
281.0165-281.0365  
F: FTMS - p ESI Full  
ms  
[85.0000-  
1275.0000] MS  
Co-Ti-3h

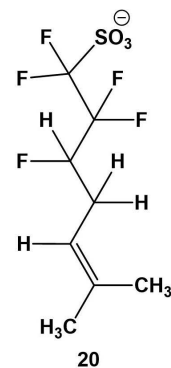

Co-Ti-3h #7283 RT: 14.30 AV: 1 NL: 3.06E5  
T: FTMS - p ESI Full ms [85.0000-1275.0000]

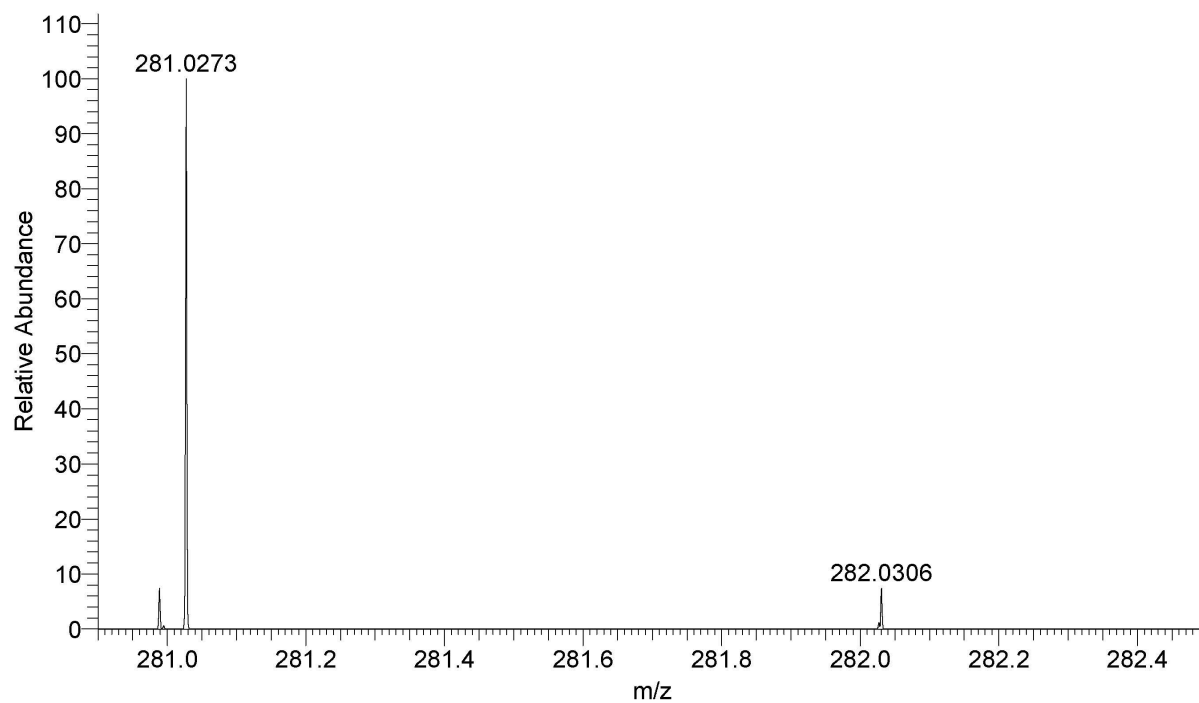



RT: 11.50 - 17.00

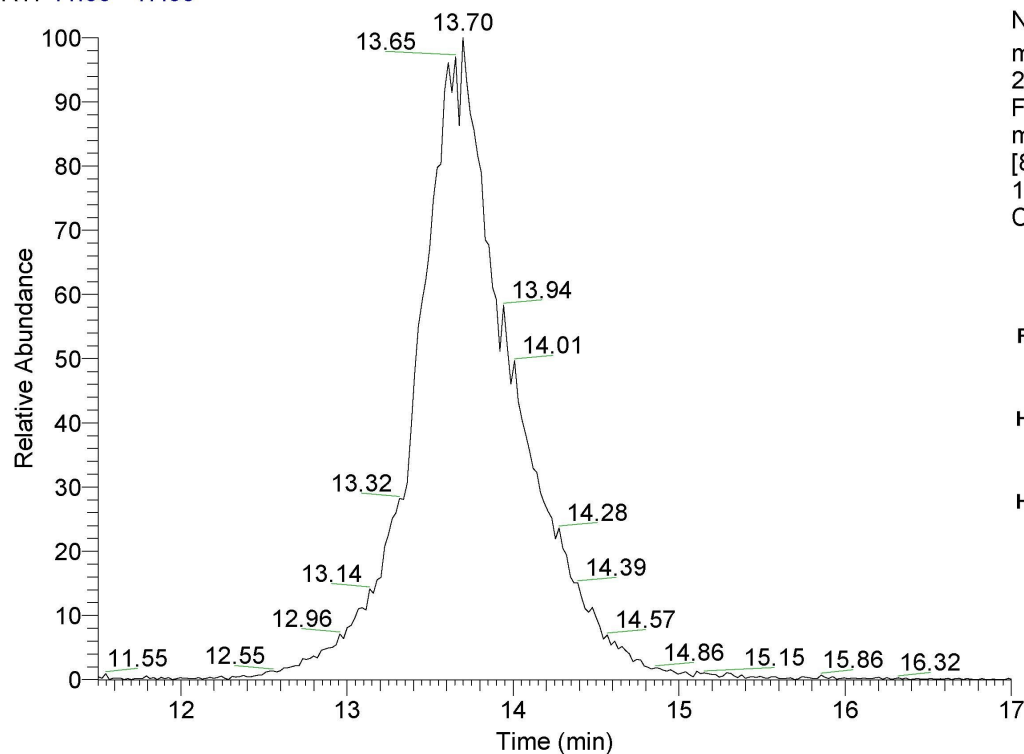

NL: 1.79E6  
m/z=  
263.0260-263.0460  
F: FTMS - p ESI Full  
ms  
[85.0000-  
1275.0000] MS  
Co-Ti-3h

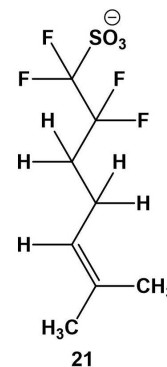

Co-Ti-3h #6953 RT: 13.63 AV: 1 NL: 1.58E6  
T: FTMS - p ESI Full ms [85.0000-1275.0000]

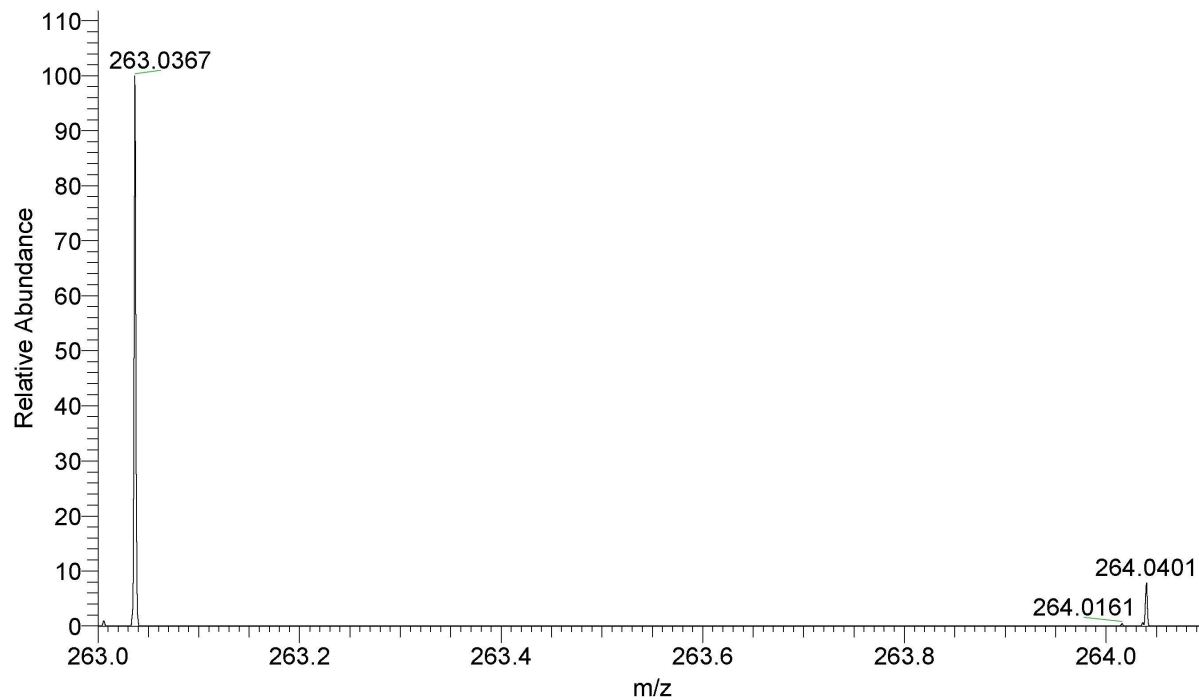

RT: 2.00 - 14.00

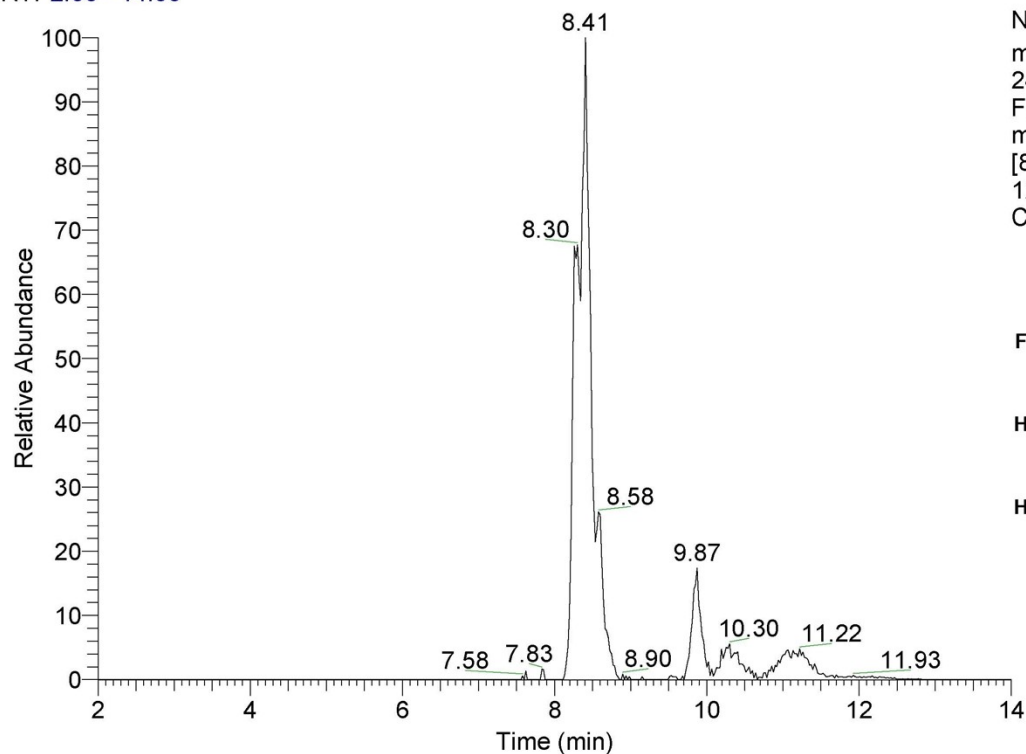

NL: 2.83E6  
m/z=  
245.0354-245.0554  
F: FTMS - p ESI Full  
ms  
[85.0000-  
1275.0000] MS  
Co-Ti-3h

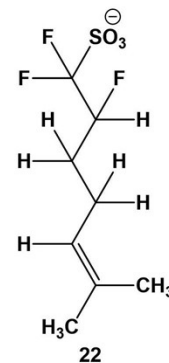

Co-Ti-3h #4313 RT: 8.41 AV: 1 NL: 2.83E6  
T: FTMS - p ESI Full ms [85.0000-1275.0000]

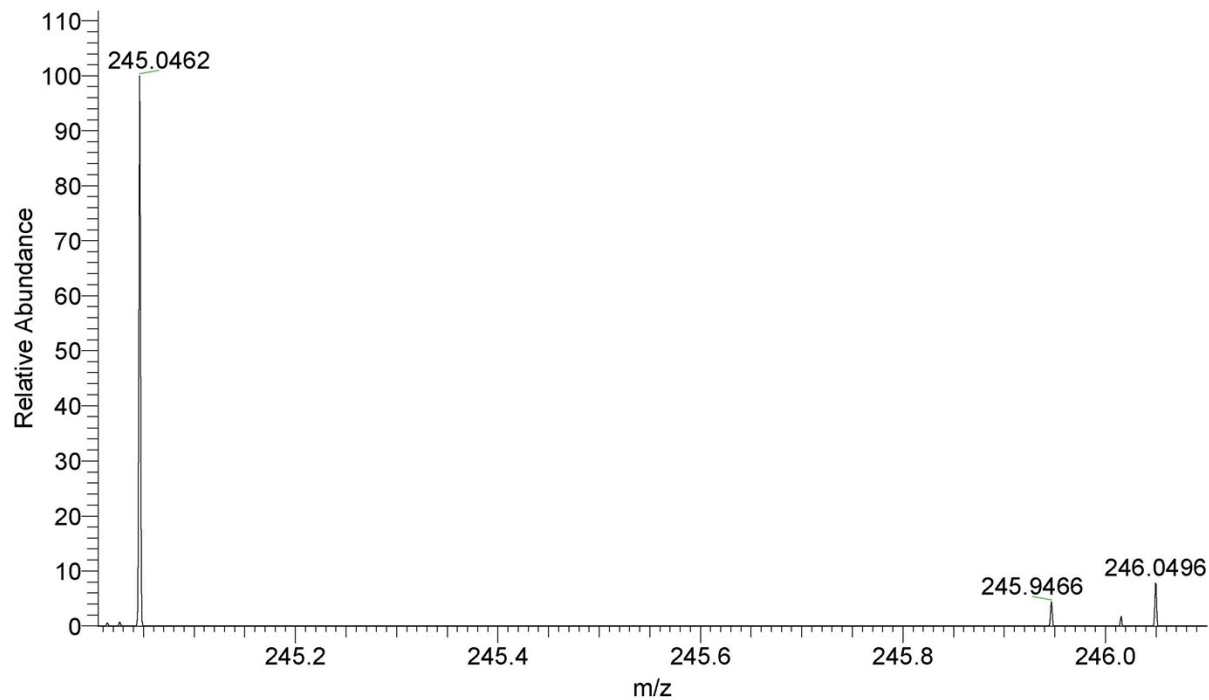

RT: 9.00 - 15.00

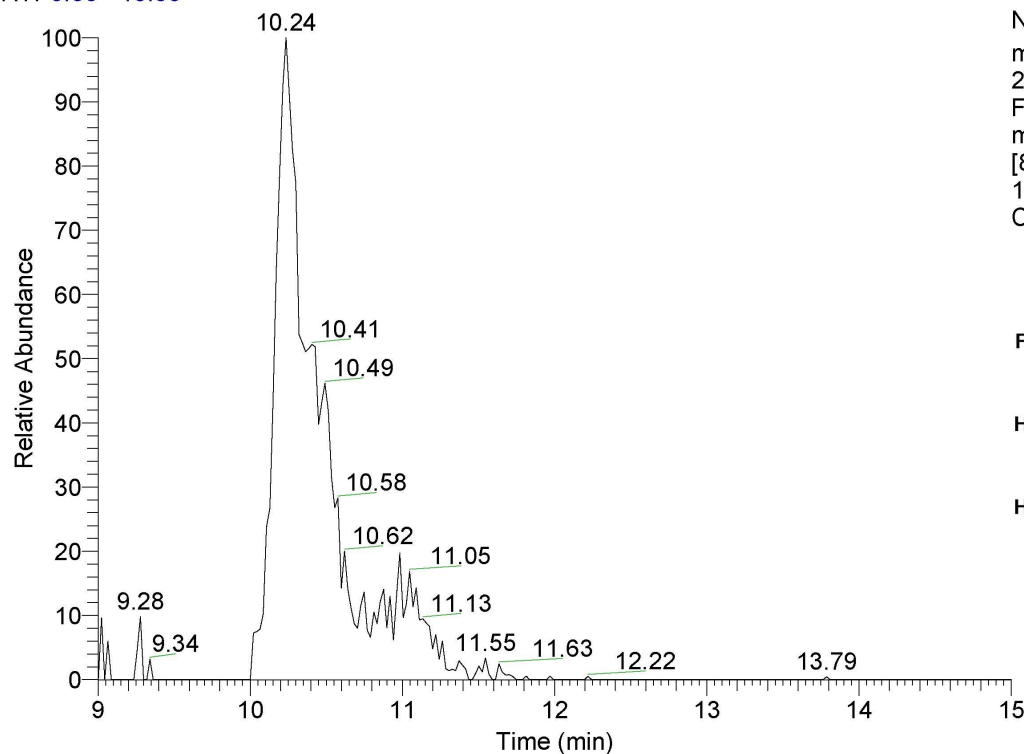

NL: 4.60E5  
m/z=  
227.0448-227.0648  
F: FTMS - p ESI Full  
ms  
[85.0000-  
1275.0000] MS  
Co-Ti-3h

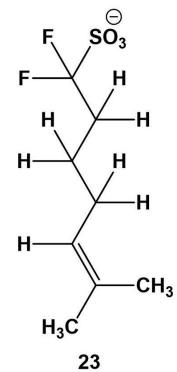

Co-Ti-3h #5292 RT: 10.30 AV: 1 NL: 3.53E5  
T: FTMS - p ESI Full ms [85.0000-1275.0000]

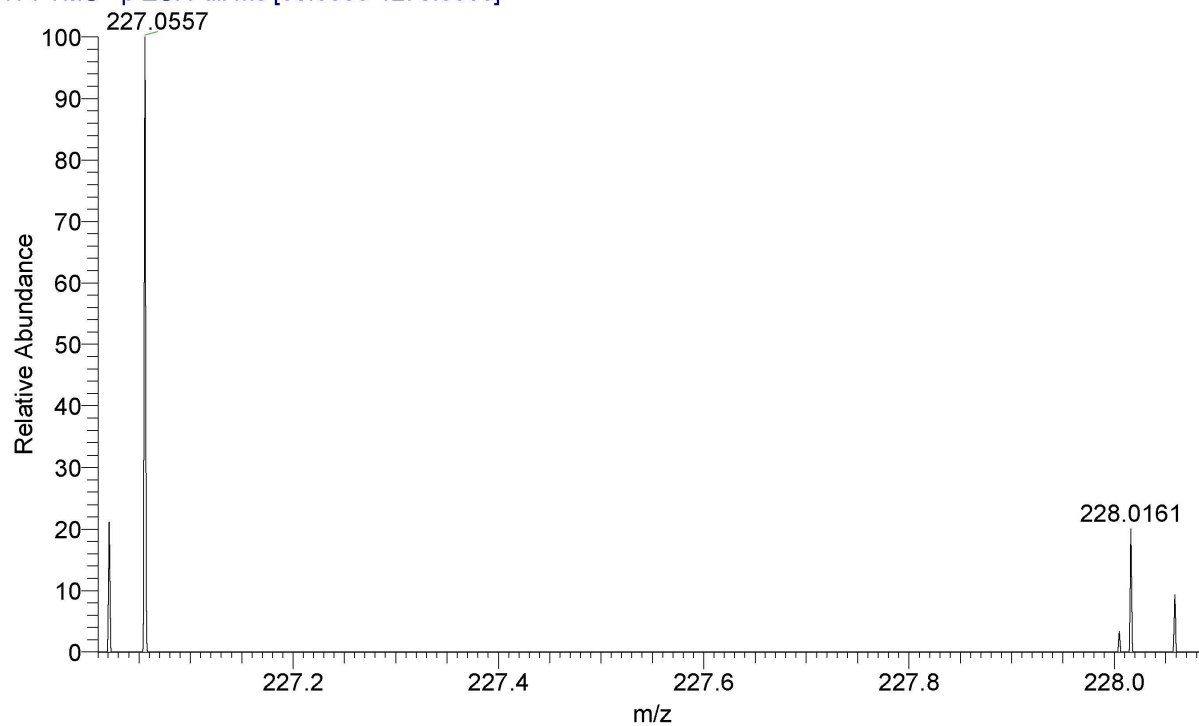

RT: 5.00 - 14.00

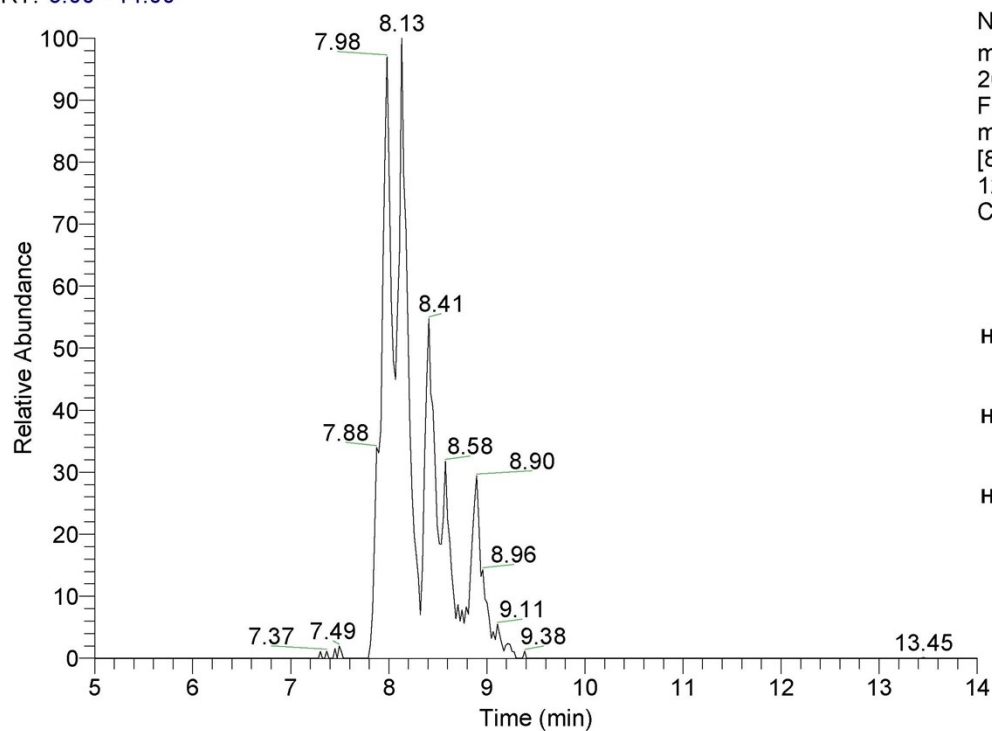

NL: 1.95E6  
m/z=  
209.0542-209.0742  
F: FTMS - p ESI Full  
ms  
[85.0000-  
1275.0000] MS  
Co-Ti-3h

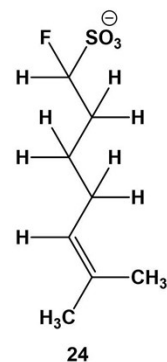

Co-Ti-3h #4082 RT: 7.96 AV: 1 NL: 1.60E6  
T: FTMS - p ESI Full ms [85.0000-1275.0000]

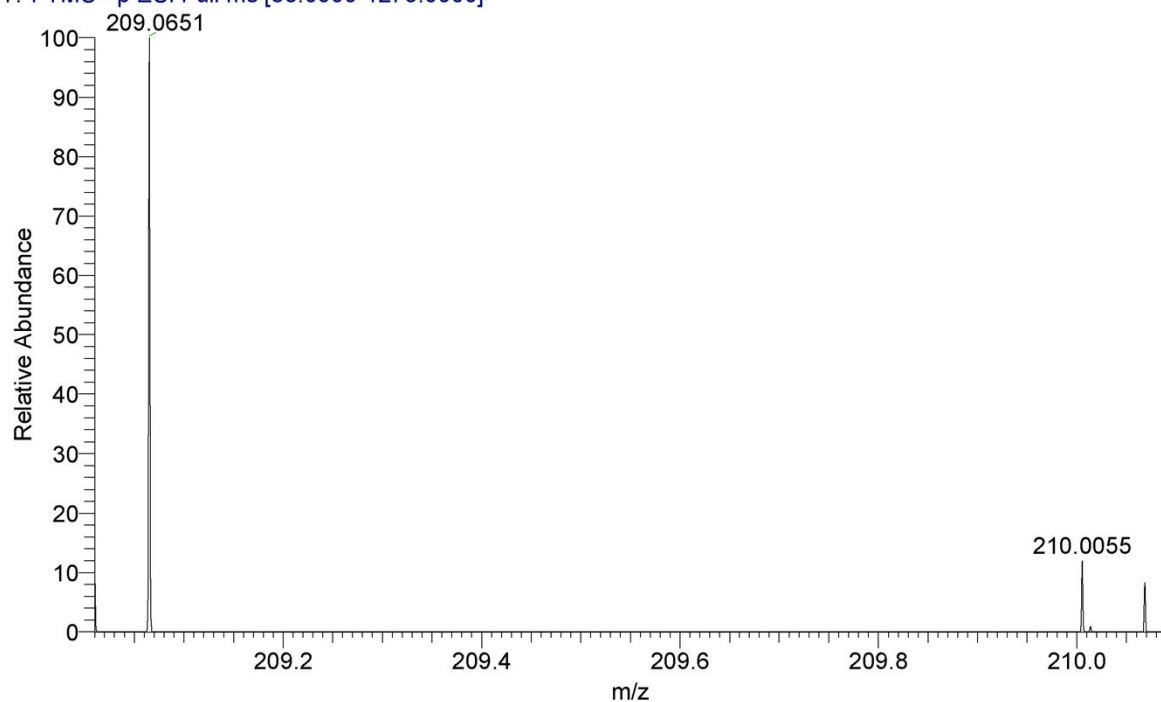

**Fig. S7.** Ion chromatographs and spectrums of the detected degradation products of PFOS defluorination via CoPc. Experimental conditions: Technical PFOS (0.1 mM), CoPc (0.25 mM), Ti<sup>III</sup> citrate (40 mM), and carbonate buffer (85 mM) in Milli Q water.

## References

1. Y. Do Kim, J. P. Kim, O. S. Kwon and I. H. Cho, The synthesis and application of thermally stable dyes for ink-jet printed LCD color filters, *Dye. Pigment.*, 2009, **81**, 45–52.
2. J. K. Joseph, S. L. Jain and B. Sain, Covalently anchored polymer immobilized Co(II) phthalocyanine as efficient catalyst for oxidation of mercaptans using molecular oxygen as oxidant, *Ind. Eng. Chem. Res.*, 2010, **49**, 6674–6677.
3. B. N. Achar and K. S. Lokesh, Studies on tetra-amine phthalocyanines, *J. Organomet. Chem.*, 2004, **689**, 3357–3361.
